# Supplementary material for: Age-related gene and miRNA expression changes in airways of healthy individuals
Source: PubMed Central journal article supplement (PMC6403379; doi:10.1038/s41598-019-39873-0), 2019-03-06
Supplement: 41598_2019_39873_MOESM1_ESM.pdf [file 41598_2019_39873_MOESM1_ESM.pdf]

# Age-related gene and miRNA expression changes in airways of healthy individuals

J Ong<sup>1,2,#</sup>, RR Woldhuis<sup>1,2,#</sup>, IM Boudewijn<sup>2,3</sup>, A van den Berg<sup>1</sup>, J Kluiver<sup>1</sup>, K Kok<sup>4</sup>, MM Terpstra<sup>4</sup>, V Guryev<sup>2,5</sup>, M de Vries<sup>2,6</sup>, CJ Vermeulen<sup>2,3</sup>, W Timens<sup>1,2</sup>, M van den Berge<sup>2,3,‡</sup>, CA Brandsma<sup>1,2,‡,\*</sup>

<sup>1</sup>University of Groningen, University Medical Center Groningen, Department of Pathology and Medical Biology, Groningen, The Netherlands

<sup>2</sup>University of Groningen, University Medical Center Groningen, Groningen Research Institute for Asthma and COPD (GRIAC), Groningen, The Netherlands

<sup>3</sup>University of Groningen, University Medical Center Groningen, Department of Pulmonary Diseases, Groningen, The Netherlands

<sup>4</sup>University of Groningen, University Medical Center Groningen, Department of Genetics, Groningen, The Netherlands

<sup>5</sup>University of Groningen, University Medical Center Groningen, European Research Institute for the Biology of Ageing, Groningen, The Netherlands

<sup>6</sup>University of Groningen, University Medical Center Groningen, Department of Epidemiology, Groningen, The Netherlands

#Co-first authors

‡Co-last authors

\*Corresponding author: CA Brandsma, E-mail: c.a.brandsma@umcg.nl

## Contents

|                                                                                                                                      |           |
|--------------------------------------------------------------------------------------------------------------------------------------|-----------|
| <b>Supplementary Figure 1. Top-3 higher and lower expressed genes and miRNAs with increasing age in bronchial biopsies . . . . .</b> | <b>2</b>  |
| <b>Supplementary Table 1. Results of the age-related genes and miRNAs obtained from the generalized linear model . . . . .</b>       | <b>3</b>  |
| Table 1A. Genes higher expressed with age . . . . .                                                                                  | 3         |
| Table 1B. Genes lower expressed with age . . . . .                                                                                   | 6         |
| Table 1C. MiRNAs higher expressed with age . . . . .                                                                                 | 8         |
| Table 1D. MiRNAs lower expressed with age . . . . .                                                                                  | 8         |
| <b>Supplementary Table 2. Gene ontology and pathway analyses using Enrichr . . . . .</b>                                             | <b>9</b>  |
| Table 2A. Biological processes of the genes higher expressed with age . . . .                                                        | 10        |
| Table 2B. Reactome pathways of the genes higher expressed with age . . . .                                                           | 11        |
| Table 2C. Biological processes of the genes lower expressed with age . . . .                                                         | 12        |
| Table 2D. Reactome pathways of the genes lower expressed with age . . . .                                                            | 21        |
| <b>Supplementary Table 3. Gene ontology and pathway analyses using g:Profiler . . . . .</b>                                          | <b>30</b> |
| Table 3A. Biological processes of the genes higher expressed with age . . . .                                                        | 31        |
| Table 3B. Reactome pathways of the genes higher expressed with age . . . .                                                           | 32        |
| Table 3C. Biological processes of the genes lower expressed with age . . . .                                                         | 33        |
| Table 3D. Reactome pathways of the genes lower expressed with age . . . .                                                            | 36        |
| <b>Supplementary Table 4. Results of the age-related predicted target gene enrichment analyses . . . . .</b>                         | <b>38</b> |

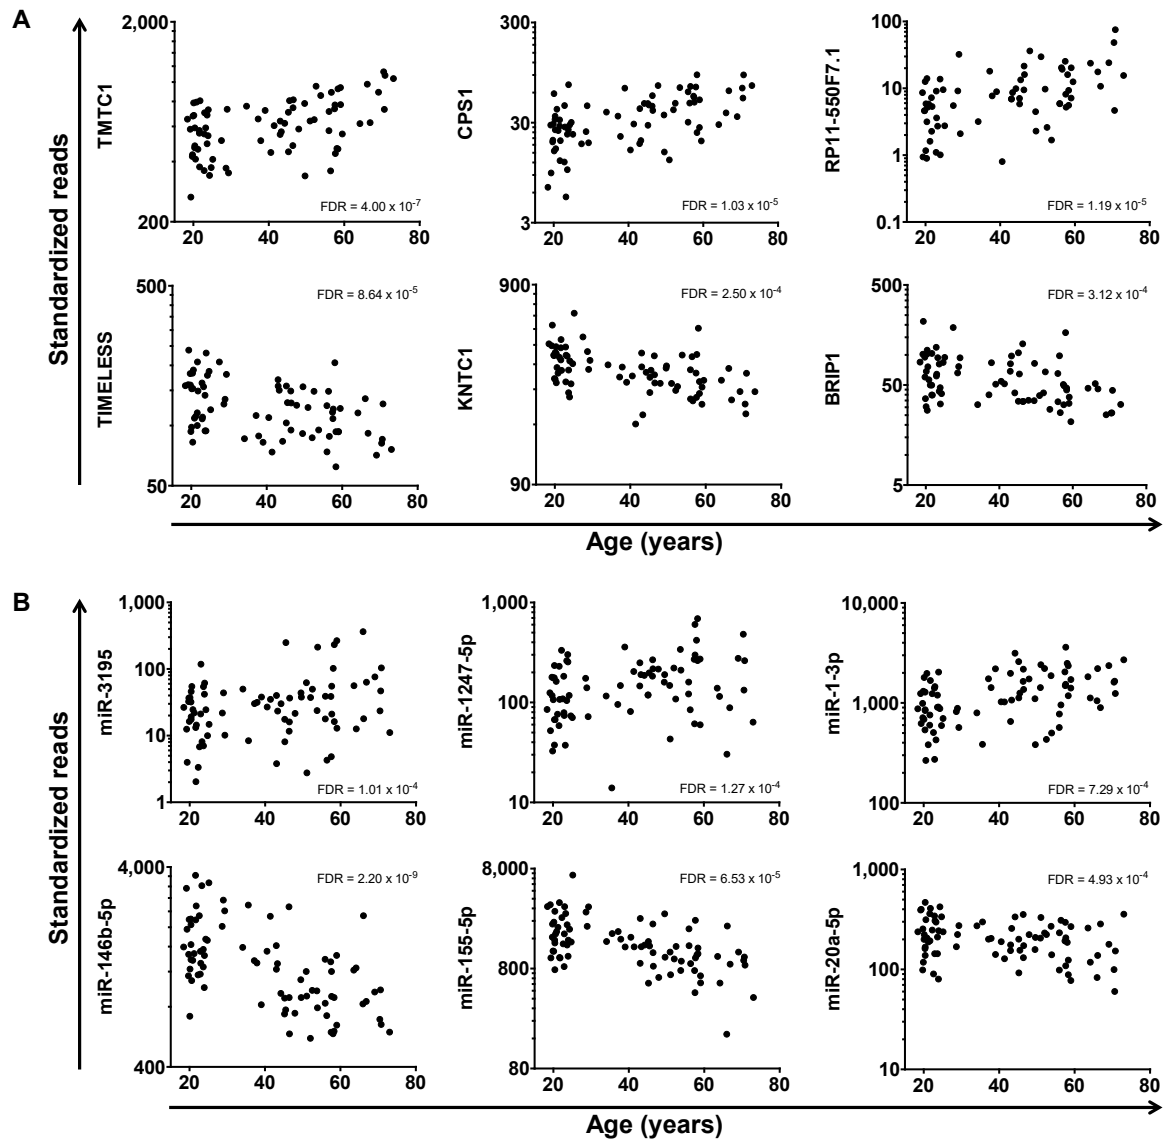

Supplementary Figure 1. Top-3 higher and lower expressed genes and miRNAs with increasing age in bronchial biopsies. The correlation plots with age of the (A) genes and (B) miRNAs that had the lowest FDR adjusted p-values were made using unadjusted data. FDR adjusted p-values are shown in the graphs.

**Supplementary Table 1. Results of the age-related genes and miRNAs obtained from the generalized linear model**

Table 1A. Genes higher expressed with age

| Genes                     |                 | Generalized linear model |          | Lung tissue |            |
|---------------------------|-----------------|--------------------------|----------|-------------|------------|
| Higher expressed with age | Mean expression | FC/year                  | FDR      | Expressed   | Replicated |
| TMTC1                     | 627             | 1.011                    | 4.00E-07 | Yes         | Yes        |
| CPS1                      | 37              | 1.019                    | 1.03E-05 | Yes         | Yes        |
| RP11-550F7.1              | 10              | 1.034                    | 1.19E-05 |             |            |
| RIMS2                     | 35              | 1.021                    | 2.97E-05 | Yes         |            |
| AP000688.8                | 48              | 1.023                    | 5.65E-05 |             |            |
| IGSF1                     | 46              | 1.021                    | 1.24E-04 | Yes         |            |
| CCL11                     | 31              | 1.030                    | 1.49E-04 | Yes         | Yes        |
| PRIMA1                    | 34              | 1.025                    | 4.23E-04 | Yes         | Yes        |
| PLEKHH2                   | 621             | 1.012                    | 4.33E-04 | Yes         | Yes        |
| GPX3                      | 532             | 1.015                    | 7.67E-04 | Yes         | Yes        |
| HDC                       | 73              | 1.018                    | 1.06E-03 | Yes         | Yes        |
| PCDH11X                   | 11              | 1.041                    | 1.43E-03 |             |            |
| PCDHB9                    | 20              | 1.018                    | 1.52E-03 | Yes         |            |
| SLC8A3                    | 12              | 1.022                    | 1.55E-03 | Yes         | Yes        |
| PDZRN4                    | 19              | 1.025                    | 1.58E-03 | Yes         | Yes        |
| CTD-2269F5.1              | 24              | 1.014                    | 1.60E-03 |             |            |
| PCSK2                     | 31              | 1.023                    | 2.01E-03 | Yes         |            |
| PCDH9                     | 70              | 1.015                    | 2.10E-03 | Yes         |            |
| EDA2R                     | 38              | 1.011                    | 2.18E-03 | Yes         | Yes        |
| LRP1B                     | 197             | 1.019                    | 2.26E-03 | Yes         |            |
| SYT8                      | 60              | 1.015                    | 2.26E-03 | Yes         | Yes        |
| NAALAD2                   | 66              | 1.011                    | 2.44E-03 | Yes         | Yes        |
| TRIM9                     | 31              | 1.017                    | 2.51E-03 | Yes         | Yes        |
| TMOD2                     | 296             | 1.009                    | 2.53E-03 | Yes         |            |
| GADL1                     | 38              | 1.025                    | 2.53E-03 | Yes         |            |
| RIMS4                     | 19              | 1.018                    | 2.53E-03 | Yes         |            |
| FGF9                      | 32              | 1.015                    | 2.78E-03 | Yes         |            |
| NR3C2                     | 474             | 1.005                    | 2.91E-03 | Yes         |            |
| NELL1                     | 18              | 1.021                    | 2.91E-03 | Yes         |            |
| RP11-15K2.2               | 13              | 1.024                    | 2.97E-03 |             |            |
| KLHL23                    | 154             | 1.011                    | 3.04E-03 | Yes         |            |
| EDIL3                     | 598             | 1.013                    | 3.71E-03 | Yes         |            |
| AC004538.3                | 26              | 1.015                    | 4.05E-03 |             |            |
| TNNI2                     | 13              | 1.019                    | 4.29E-03 | Yes         | Yes        |
| LINC00691                 | 12              | 1.019                    | 4.36E-03 |             |            |
| LPHN3                     | 81              | 1.016                    | 4.50E-03 | Yes         | Yes        |
| CTC-260E6.6               | 30              | 1.020                    | 4.50E-03 |             |            |
| UGT1A10                   | 21              | 1.021                    | 4.50E-03 |             |            |
| NRXN1                     | 138             | 1.015                    | 5.76E-03 | Yes         |            |
| PCDHB13                   | 40              | 1.011                    | 6.43E-03 | Yes         |            |
| HPGD                      | 262             | 1.016                    | 6.72E-03 | Yes         |            |
| KCNIP2                    | 41              | 1.014                    | 6.72E-03 | Yes         |            |
| TMEM252                   | 13              | 1.018                    | 6.72E-03 |             |            |
| ASPA                      | 63              | 1.014                    | 6.92E-03 | Yes         | Yes        |
| PCDHB4                    | 31              | 1.012                    | 7.83E-03 | Yes         | Yes        |
| DIO3                      | 11              | 1.025                    | 8.00E-03 | Yes         |            |
| DDIT4L                    | 43              | 1.017                    | 9.62E-03 | Yes         | Yes        |
| NEGR1                     | 302             | 1.014                    | 1.16E-02 | Yes         | Yes        |
| AMIGO2                    | 178             | 1.007                    | 1.26E-02 | Yes         | Yes        |
| CDH19                     | 96              | 1.020                    | 1.26E-02 | Yes         |            |
| DGKB                      | 35              | 1.020                    | 1.26E-02 | Yes         |            |
| TRHDE-AS1                 | 22              | 1.019                    | 1.26E-02 |             |            |
| DIO3OS                    | 90              | 1.018                    | 1.28E-02 | Yes         |            |
| L1CAM                     | 82              | 1.020                    | 1.31E-02 | Yes         | Yes        |
| RP1-142L7.5               | 29              | 1.017                    | 1.32E-02 |             |            |

Table 1A (Continued)

| Genes                     |                 | Generalized linear model |          | Lung tissue |            |
|---------------------------|-----------------|--------------------------|----------|-------------|------------|
| Higher expressed with age | Mean expression | FC/year                  | FDR      | Expressed   | Replicated |
| PCDHB12                   | 23              | 1.015                    | 1.33E-02 | Yes         | Yes        |
| KIT                       | 414             | 1.011                    | 1.49E-02 | Yes         |            |
| PRDM5                     | 182             | 1.008                    | 1.51E-02 | Yes         |            |
| MPP6                      | 400             | 1.007                    | 1.51E-02 | Yes         |            |
| FMO3                      | 373             | 1.011                    | 1.51E-02 | Yes         | Yes        |
| NCAM1                     | 63              | 1.013                    | 1.61E-02 | Yes         |            |
| PRKCA                     | 483             | 1.004                    | 1.62E-02 | Yes         |            |
| ZNF676                    | 16              | 1.018                    | 1.62E-02 | Yes         | Yes        |
| PCDHB14                   | 58              | 1.009                    | 1.67E-02 | Yes         | Yes        |
| XKR4                      | 106             | 1.019                    | 1.70E-02 | Yes         |            |
| RP11-468H14.2             | 15              | 1.012                    | 1.76E-02 |             |            |
| RP11-332H18.4             | 25              | 1.014                    | 1.78E-02 |             |            |
| GRIK3                     | 51              | 1.019                    | 1.86E-02 | Yes         |            |
| MTUS2                     | 18              | 1.023                    | 1.99E-02 |             |            |
| SBDSP1                    | 165             | 1.006                    | 2.13E-02 |             |            |
| AC007362.3                | 30              | 1.012                    | 2.13E-02 |             |            |
| SLITRK3                   | 119             | 1.024                    | 2.17E-02 | Yes         | Yes        |
| ZKSCAN8                   | 567             | 1.003                    | 2.17E-02 |             |            |
| TENM3                     | 81              | 1.009                    | 2.17E-02 |             |            |
| C9orf47                   | 31              | 1.018                    | 2.17E-02 | Yes         | Yes        |
| SLC12A1                   | 13              | 1.020                    | 2.17E-02 | Yes         |            |
| MME                       | 215             | 1.017                    | 2.26E-02 | Yes         |            |
| RP3-525N10.2              | 15              | 1.017                    | 2.30E-02 |             |            |
| NCAM2                     | 62              | 1.016                    | 2.32E-02 | Yes         | Yes        |
| EPHA7                     | 284             | 1.012                    | 2.37E-02 | Yes         |            |
| ADAMTS6                   | 68              | 1.012                    | 2.42E-02 | Yes         |            |
| AJAP1                     | 146             | 1.015                    | 2.49E-02 | Yes         | Yes        |
| PCDHB10                   | 21              | 1.014                    | 2.49E-02 | Yes         | Yes        |
| NRP2                      | 939             | 1.009                    | 2.59E-02 | Yes         |            |
| ANGPT1                    | 179             | 1.012                    | 2.59E-02 | Yes         | Yes        |
| VGLL3                     | 322             | 1.010                    | 2.60E-02 | Yes         | Yes        |
| PCDHB6                    | 10              | 1.015                    | 2.82E-02 | Yes         | Yes        |
| CACNB2                    | 144             | 1.009                    | 2.83E-02 | Yes         |            |
| FAM13C                    | 174             | 1.009                    | 2.83E-02 |             |            |
| WNT2B                     | 287             | 1.006                    | 2.83E-02 | Yes         |            |
| C6                        | 89              | 1.029                    | 2.83E-02 | Yes         | Yes        |
| TBX5                      | 81              | 1.015                    | 2.83E-02 | Yes         | Yes        |
| CNKSR2                    | 61              | 1.012                    | 2.83E-02 | Yes         | Yes        |
| PMP2                      | 31              | 1.024                    | 2.83E-02 | Yes         |            |
| FGF14-AS2                 | 30              | 1.009                    | 2.83E-02 |             |            |
| TPSD1                     | 10              | 1.027                    | 2.87E-02 | Yes         |            |
| DIRAS3                    | 31              | 1.012                    | 2.88E-02 | Yes         | Yes        |
| PCDHGA5                   | 43              | 1.010                    | 2.91E-02 | Yes         |            |
| FIBIN                     | 76              | 1.013                    | 2.93E-02 |             |            |
| RAB44                     | 15              | 1.014                    | 3.00E-02 |             |            |
| TMEFF2                    | 28              | 1.013                    | 3.03E-02 | Yes         | Yes        |
| LOC100421166              | 50              | 1.013                    | 3.07E-02 |             |            |
| AK5                       | 22              | 1.012                    | 3.07E-02 | Yes         |            |
| SLC24A2                   | 18              | 1.028                    | 3.07E-02 | Yes         |            |
| TBX4                      | 162             | 1.015                    | 3.08E-02 | Yes         | Yes        |
| CDR1                      | 136             | 1.021                    | 3.08E-02 | Yes         | Yes        |
| RP11-268J15.5             | 21              | 1.013                    | 3.08E-02 |             |            |
| HAP1                      | 42              | 1.014                    | 3.36E-02 | Yes         |            |
| HPSE2                     | 91              | 1.017                    | 3.46E-02 | Yes         | Yes        |
| GAS2                      | 34              | 1.010                    | 3.46E-02 | Yes         |            |
| PHYH                      | 123             | 1.006                    | 3.51E-02 | Yes         |            |
| CACNA2D3                  | 70              | 1.009                    | 3.51E-02 | Yes         | Yes        |
| FAT3                      | 281             | 1.012                    | 3.53E-02 | Yes         |            |
| PGR                       | 157             | 1.014                    | 3.54E-02 | Yes         | Yes        |
| FBXO32                    | 707             | 1.006                    | 3.59E-02 | Yes         | Yes        |

Table 1A (Continued)

| Genes                     |                 | Generalized linear model |          | Lung tissue |            |
|---------------------------|-----------------|--------------------------|----------|-------------|------------|
| Higher expressed with age | Mean expression | FC/year                  | FDR      | Expressed   | Replicated |
| LIN7A                     | 58              | 1.010                    | 3.59E-02 | Yes         |            |
| GHR                       | 138             | 1.006                    | 3.62E-02 | Yes         | Yes        |
| PRKG2                     | 37              | 1.010                    | 3.62E-02 | Yes         |            |
| DLG2                      | 117             | 1.006                    | 3.70E-02 | Yes         | Yes        |
| RASD2                     | 84              | 1.015                    | 3.82E-02 | Yes         | Yes        |
| NTS                       | 802             | 1.020                    | 3.85E-02 | Yes         |            |
| FGF14-IT1                 | 64              | 1.011                    | 3.85E-02 |             |            |
| SORCS1                    | 55              | 1.012                    | 3.91E-02 | Yes         |            |
| TMOD1                     | 48              | 1.015                    | 3.97E-02 | Yes         | Yes        |
| KCNMB4                    | 26              | 1.012                    | 3.97E-02 | Yes         |            |
| HOXA2                     | 16              | 1.015                    | 3.97E-02 | Yes         | Yes        |
| ZNF438                    | 115             | 1.005                    | 3.98E-02 | Yes         |            |
| MYOC                      | 68              | 1.024                    | 3.98E-02 | Yes         | Yes        |
| ROBO2                     | 351             | 1.011                    | 4.08E-02 | Yes         | Yes        |
| SLC23A2                   | 843             | 1.005                    | 4.08E-02 | Yes         | Yes        |
| CCBE1                     | 76              | 1.014                    | 4.08E-02 | Yes         |            |
| MPPED2                    | 75              | 1.008                    | 4.08E-02 | Yes         | Yes        |
| UCHL1                     | 70              | 1.020                    | 4.28E-02 | Yes         |            |
| SNX15                     | 24              | 1.010                    | 4.41E-02 | Yes         |            |
| CSMD3                     | 44              | 1.030                    | 4.50E-02 | Yes         | Yes        |
| RP11-88I18.2              | 38              | 1.016                    | 4.59E-02 |             |            |
| MLTK                      | 698             | 1.009                    | 4.71E-02 |             |            |
| SERPINB11                 | 608             | 1.013                    | 4.76E-02 | Yes         |            |
| NTPCR                     | 360             | 1.004                    | 4.80E-02 |             |            |
| SH3D19                    | 1,082           | 1.004                    | 4.80E-02 | Yes         |            |
| PLAT                      | 186             | 1.011                    | 4.80E-02 | Yes         | Yes        |
| GPM6A                     | 53              | 1.017                    | 4.86E-02 | Yes         |            |
| HOXA-AS2                  | 40              | 1.014                    | 4.86E-02 |             |            |
| RASL11B                   | 23              | 1.016                    | 4.86E-02 | Yes         | Yes        |
| PDE5A                     | 1,588           | 1.012                    | 4.88E-02 | Yes         | Yes        |
| SLC22A15                  | 110             | 1.006                    | 4.88E-02 | Yes         |            |
| PCDHGA4                   | 33              | 1.010                    | 4.88E-02 | Yes         |            |
| TUSC7                     | 10              | 1.021                    | 5.00E-02 |             |            |
| HSPA12A                   | 94              | 1.011                    | 5.00E-02 | Yes         | Yes        |

Table 1B. Genes lower expressed with age

| Genes                    |                 | Generalized linear model |          | Lung tissue |            |
|--------------------------|-----------------|--------------------------|----------|-------------|------------|
| Lower expressed with age | Mean expression | FC/year                  | FDR      | Expressed   | Replicated |
| TIMELESS                 | 128             | -1.010                   | 8.64E-05 | Yes         |            |
| KNTC1                    | 341             | -1.008                   | 2.50E-04 | Yes         |            |
| BRIP1                    | 63              | -1.016                   | 3.12E-04 | Yes         |            |
| E2F1                     | 17              | -1.019                   | 4.33E-04 | Yes         | Yes        |
| BLNK                     | 103             | -1.009                   | 1.52E-03 | Yes         |            |
| BLM                      | 47              | -1.020                   | 1.53E-03 | Yes         |            |
| ASPM                     | 115             | -1.023                   | 1.58E-03 | Yes         | Yes        |
| IQGAP3                   | 48              | -1.023                   | 1.58E-03 | Yes         | Yes        |
| MKI67                    | 249             | -1.022                   | 1.71E-03 | Yes         | Yes        |
| CPXM1                    | 26              | -1.015                   | 2.05E-03 | Yes         |            |
| BRCA2                    | 142             | -1.011                   | 2.18E-03 | Yes         | Yes        |
| DTL                      | 34              | -1.020                   | 2.26E-03 | Yes         | Yes        |
| CENPF                    | 224             | -1.016                   | 2.51E-03 | Yes         | Yes        |
| NUP210                   | 369             | -1.010                   | 2.59E-03 | Yes         |            |
| NCAPH                    | 26              | -1.018                   | 2.86E-03 | Yes         |            |
| NOX5                     | 20              | -1.023                   | 2.95E-03 | Yes         |            |
| MCM5                     | 247             | -1.007                   | 3.52E-03 | Yes         |            |
| PSD4                     | 734             | -1.005                   | 4.29E-03 | Yes         |            |
| TACC3                    | 65              | -1.011                   | 4.29E-03 | Yes         |            |
| XKRX                     | 114             | -1.009                   | 6.26E-03 | Yes         | Yes        |
| CASC5                    | 87              | -1.016                   | 7.83E-03 | Yes         | Yes        |
| SLC13A2                  | 42              | -1.024                   | 7.83E-03 | Yes         | Yes        |
| NUSAP1                   | 62              | -1.019                   | 8.00E-03 | Yes         | Yes        |
| LMNB1                    | 112             | -1.013                   | 8.53E-03 | Yes         | Yes        |
| INSR                     | 1,868           | -1.006                   | 9.03E-03 | Yes         |            |
| ARHGAP26                 | 684             | -1.006                   | 1.02E-02 | Yes         |            |
| BTN2A2                   | 146             | -1.008                   | 1.05E-02 | Yes         |            |
| CDCA2                    | 21              | -1.021                   | 1.10E-02 | Yes         |            |
| TOP2A                    | 242             | -1.019                   | 1.11E-02 | Yes         | Yes        |
| FANCD2                   | 111             | -1.008                   | 1.13E-02 | Yes         |            |
| DIAPH3                   | 20              | -1.021                   | 1.17E-02 | Yes         |            |
| KIF14                    | 26              | -1.019                   | 1.19E-02 | Yes         | Yes        |
| HSH2D                    | 119             | -1.010                   | 1.21E-02 | Yes         |            |
| MYO3A                    | 27              | -1.021                   | 1.25E-02 | Yes         |            |
| ITGAE                    | 193             | -1.012                   | 1.26E-02 | Yes         | Yes        |
| LIMD1                    | 519             | -1.004                   | 1.32E-02 |             |            |
| HCK                      | 62              | -1.014                   | 1.33E-02 | Yes         |            |
| RFWD3                    | 272             | -1.005                   | 1.44E-02 | Yes         |            |
| WHSC1                    | 705             | -1.005                   | 1.45E-02 | Yes         | Yes        |
| MERTK                    | 179             | -1.006                   | 1.49E-02 | Yes         |            |
| HAPLN3                   | 69              | -1.011                   | 1.51E-02 | Yes         |            |
| CENPE                    | 66              | -1.016                   | 1.51E-02 | Yes         | Yes        |
| IGHV4-34                 | 18              | -1.031                   | 1.51E-02 |             |            |
| IGHD                     | 443             | -1.037                   | 1.62E-02 | Yes         | Yes        |
| HIST1H2AJ                | 31              | -1.024                   | 1.62E-02 | Yes         | Yes        |
| ASF1B                    | 27              | -1.017                   | 1.67E-02 | Yes         |            |
| PIK3AP1                  | 123             | -1.015                   | 2.08E-02 | Yes         | Yes        |
| IDO1                     | 78              | -1.036                   | 2.17E-02 |             |            |
| CXCL10                   | 44              | -1.033                   | 2.26E-02 | Yes         |            |
| TAP1                     | 370             | -1.013                   | 2.27E-02 | Yes         |            |
| HLA-B                    | 3,505           | -1.014                   | 2.30E-02 | Yes         |            |
| FANCA                    | 74              | -1.009                   | 2.42E-02 | Yes         |            |
| BUB1B                    | 37              | -1.014                   | 2.42E-02 | Yes         | Yes        |
| CDC20                    | 35              | -1.017                   | 2.46E-02 | Yes         |            |
| TNFRSF11A                | 74              | -1.014                   | 2.49E-02 | Yes         |            |
| HMGA2                    | 92              | -1.009                   | 2.57E-02 | Yes         |            |
| LAMP3                    | 105             | -1.013                   | 2.59E-02 | Yes         | Yes        |
| ARHGAP11A                | 66              | -1.012                   | 2.59E-02 | Yes         | Yes        |
| UBE2C                    | 15              | -1.024                   | 2.59E-02 | Yes         | Yes        |

Table 1B (Continued)

| Genes                    |                 | Generalized linear model |          | Lung tissue |            |
|--------------------------|-----------------|--------------------------|----------|-------------|------------|
| Lower expressed with age | Mean expression | FC/year                  | FDR      | Expressed   | Replicated |
| PARP14                   | 2,079           | -1.007                   | 2.83E-02 | Yes         |            |
| HIVEP1                   | 633             | -1.004                   | 2.83E-02 | Yes         | Yes        |
| CENPU                    | 56              | -1.010                   | 2.83E-02 |             |            |
| KIF15                    | 33              | -1.015                   | 2.83E-02 | Yes         | Yes        |
| MYBL2                    | 16              | -1.022                   | 2.83E-02 | Yes         |            |
| IGKV3-15                 | 15              | -1.029                   | 2.83E-02 |             |            |
| CD52                     | 34              | -1.017                   | 2.86E-02 | Yes         |            |
| SSH2                     | 470             | -1.004                   | 2.87E-02 | Yes         | Yes        |
| IGKV3-11                 | 42              | -1.026                   | 2.87E-02 |             |            |
| RP11-1220K2.2            | 48              | -1.042                   | 2.89E-02 |             |            |
| ZDHHC7                   | 557             | -1.003                   | 2.90E-02 | Yes         |            |
| MCM10                    | 15              | -1.023                   | 2.90E-02 | Yes         |            |
| ZNF518B                  | 430             | -1.005                   | 2.91E-02 | Yes         | Yes        |
| RHBDF2                   | 177             | -1.008                   | 2.91E-02 | Yes         |            |
| HLA-DMA                  | 261             | -1.011                   | 2.91E-02 | Yes         |            |
| C1orf51                  | 65              | -1.015                   | 2.91E-02 | Yes         |            |
| ZNF367                   | 32              | -1.013                   | 3.03E-02 | Yes         | Yes        |
| EPHX3                    | 24              | -1.017                   | 3.03E-02 |             |            |
| NLRC5                    | 893             | -1.011                   | 3.05E-02 | Yes         |            |
| MAP7D2                   | 14              | -1.015                   | 3.05E-02 | Yes         |            |
| AURKB                    | 13              | -1.020                   | 3.05E-02 | Yes         |            |
| ABCC4                    | 646             | -1.005                   | 3.07E-02 | Yes         | Yes        |
| KIF11                    | 113             | -1.011                   | 3.07E-02 | Yes         | Yes        |
| RAB42                    | 10              | -1.014                   | 3.07E-02 |             |            |
| ATAD2                    | 327             | -1.006                   | 3.30E-02 | Yes         |            |
| IL2RB                    | 224             | -1.010                   | 3.34E-02 | Yes         |            |
| HJURP                    | 20              | -1.017                   | 3.42E-02 | Yes         | Yes        |
| ERBB3                    | 1,218           | -1.006                   | 3.46E-02 | Yes         | Yes        |
| KIFC1                    | 38              | -1.015                   | 3.51E-02 | Yes         | Yes        |
| SLC34A2                  | 865             | -1.012                   | 3.54E-02 |             |            |
| DENND1C                  | 125             | -1.007                   | 3.59E-02 | Yes         | Yes        |
| CIT                      | 268             | -1.009                   | 3.61E-02 | Yes         | Yes        |
| RRM2                     | 79              | -1.019                   | 3.61E-02 | Yes         | Yes        |
| TPX2                     | 51              | -1.016                   | 3.65E-02 | Yes         |            |
| HIST1H1A                 | 22              | -1.017                   | 3.69E-02 | Yes         |            |
| MYO7A                    | 53              | -1.014                   | 3.72E-02 | Yes         |            |
| ESPL1                    | 38              | -1.016                   | 3.72E-02 | Yes         | Yes        |
| AIM2                     | 21              | -1.017                   | 3.72E-02 |             |            |
| TRANK1                   | 834             | -1.005                   | 3.72E-02 |             |            |
| OAS3                     | 343             | -1.007                   | 3.89E-02 | Yes         |            |
| LPO                      | 158             | -1.049                   | 3.97E-02 | Yes         | Yes        |
| KIF23                    | 57              | -1.013                   | 3.97E-02 | Yes         |            |
| COL22A1                  | 18              | -1.015                   | 3.98E-02 | Yes         | Yes        |
| SLAMF8                   | 37              | -1.012                   | 4.02E-02 | Yes         |            |
| NAPSB                    | 53              | -1.013                   | 4.06E-02 | Yes         |            |
| HLA-DOA                  | 188             | -1.015                   | 4.08E-02 | Yes         |            |
| CHEK1                    | 46              | -1.010                   | 4.08E-02 | Yes         | Yes        |
| IGLV3-25                 | 23              | -1.038                   | 4.08E-02 | Yes         |            |
| GZMB                     | 18              | -1.022                   | 4.08E-02 | Yes         |            |
| CD7                      | 21              | -1.016                   | 4.21E-02 | Yes         |            |
| BUB1                     | 50              | -1.016                   | 4.29E-02 | Yes         | Yes        |
| CD79A                    | 44              | -1.026                   | 4.29E-02 | Yes         |            |
| HELLS                    | 327             | -1.007                   | 4.41E-02 | Yes         |            |
| KEL                      | 65              | -1.011                   | 4.43E-02 | Yes         |            |
| TLR10                    | 28              | -1.024                   | 4.46E-02 | Yes         |            |
| ORC1                     | 21              | -1.014                   | 4.46E-02 |             |            |
| HIST1H2BL                | 22              | -1.018                   | 4.47E-02 | Yes         |            |
| CD97                     | 307             | -1.007                   | 4.59E-02 | Yes         |            |
| JAK3                     | 186             | -1.012                   | 4.65E-02 | Yes         |            |
| GINS1                    | 42              | -1.009                   | 4.65E-02 | Yes         |            |



Table 1B (Continued)

| Genes                    |                 | Generalized linear model |          | Lung tissue |            |
|--------------------------|-----------------|--------------------------|----------|-------------|------------|
| Lower expressed with age | Mean expression | FC/year                  | FDR      | Expressed   | Replicated |
| IGHV3-21                 | 30              | -1.032                   | 4.65E-02 |             |            |
| SPATA32                  | 15              | -1.011                   | 4.65E-02 |             |            |
| HLA-F                    | 334             | -1.011                   | 4.69E-02 | Yes         |            |
| RMI2                     | 28              | -1.013                   | 4.71E-02 |             |            |
| DTX3L                    | 715             | -1.007                   | 4.81E-02 | Yes         |            |
| MARCKSL1                 | 135             | -1.011                   | 4.86E-02 | Yes         |            |
| PTPN6                    | 306             | -1.005                   | 4.86E-02 | Yes         |            |
| EPB41                    | 498             | -1.004                   | 4.86E-02 | Yes         |            |
| SIRPG                    | 10              | -1.022                   | 4.86E-02 | Yes         |            |
| PSME4                    | 1,226           | -1.004                   | 4.89E-02 | Yes         | Yes        |
| GCN1L1                   | 1,392           | -1.003                   | 4.93E-02 | Yes         |            |
| BTN3A1                   | 496             | -1.009                   | 4.93E-02 | Yes         |            |
| LGALS9                   | 147             | -1.006                   | 4.93E-02 |             |            |
| SLC26A4                  | 36              | -1.035                   | 4.97E-02 | Yes         |            |
| DHX16                    | 401             | -1.003                   | 4.99E-02 | Yes         |            |
| STAT1                    | 1,754           | -1.013                   | 4.99E-02 | Yes         |            |
| IGLV3-1                  | 18              | -1.028                   | 5.00E-02 |             |            |

Table 1C. MiRNAs higher expressed with age

| miRNAs                    |                 | Generalized linear model |          |
|---------------------------|-----------------|--------------------------|----------|
| Higher expressed with age | Mean expression | FC/year                  | FDR      |
| miR-3195                  | 44              | 1.03                     | 1.01E-04 |
| miR-1247-5p               | 186             | 1.02                     | 1.27E-04 |
| miR-1-3p                  | 1,301           | 1.015                    | 7.29E-04 |
| miR-3960                  | 126             | 1.025                    | 7.78E-04 |
| miR-133a-3p               | 314             | 1.017                    | 1.44E-03 |
| miR-145-5p                | 5,495           | 1.011                    | 2.23E-03 |
| miR-145-3p                | 1,146           | 1.01                     | 3.22E-03 |
| let-7b-3p                 | 77              | 1.015                    | 1.39E-02 |
| miR-143-3p                | 51,915          | 1.009                    | 1.83E-02 |
| miR-30a-5p                | 3,038           | 1.005                    | 3.88E-02 |
| miR-30c-5p                | 5,276           | 1.006                    | 4.55E-02 |
| miR-99a-5p                | 3,018           | 1.005                    | 4.55E-02 |
| miR-338-3p                | 16              | 1.019                    | 4.55E-02 |
| miR-30a-3p                | 613             | 1.005                    | 4.98E-02 |

Table 1D. MiRNAs lower expressed with age

| miRNAs                   |                 | Generalized linear model |          |
|--------------------------|-----------------|--------------------------|----------|
| Lower expressed with age | Mean expression | FC/year                  | FDR      |
| miR-146b-5p              | 1,407           | -1.018                   | 2.20E-09 |
| miR-155-5p               | 1,592           | -1.016                   | 6.53E-05 |
| miR-20a-5p               | 216             | -1.012                   | 4.93E-04 |
| miR-142-5p               | 480             | -1.013                   | 7.29E-04 |
| miR-342-3p               | 1,149           | -1.008                   | 1.77E-03 |
| miR-150-5p               | 2,338           | -1.011                   | 2.01E-03 |
| miR-146a-5p              | 1,313           | -1.012                   | 4.45E-03 |
| miR-409-3p               | 59              | -1.009                   | 1.27E-02 |
| miR-142-3p               | 64              | -1.013                   | 1.63E-02 |
| miR-362-5p               | 29              | -1.012                   | 1.71E-02 |
| miR-1260b                | 548             | -1.009                   | 4.55E-02 |
| miR-223-3p               | 1,375           | -1.011                   | 4.55E-02 |
| miR-7-5p                 | 63              | -1.011                   | 4.55E-02 |

**Supplementary Table 2. Gene ontology and pathway analyses using Enrichr**

Table 2A. Biological processes of the genes higher expressed with age

| Term                                                                                          | Overlap | P-value  | Adjusted P-value | Z-score | Combined Score | Genes                                                                                                                    |
|-----------------------------------------------------------------------------------------------|---------|----------|------------------|---------|----------------|--------------------------------------------------------------------------------------------------------------------------|
| synapse assembly (GO:0007416)                                                                 | 9/64    | 1.08E-09 | 8.33E-07         | -1.773  | 36.614         | GPM6A;NRXN1;PCDHB6;PCDHB14;PCDHB13;PCDHB4;PCDHB12;PCDHB10;PCDHB9                                                         |
| nervous system development (GO:0007399)                                                       | 18/456  | 8.96E-09 | 3.46E-06         | -1.326  | 24.563         | ROBO2;GPM6A;PCDHGA5;PCDHGA4;NRXN1;TMOD2;PCDHB14;PCDHB13;PCDHB12;LICAM;PCDHB10;NELL1;DLG2;MPPE2;PCDHB6;PCDHB4;HAP1;PCDHB9 |
| calcium-dependent cell-cell adhesion via plasma membrane cell adhesion molecules (GO:0016339) | 7/42    | 2.40E-08 | 5.79E-06         | -1.508  | 26.465         | PCDHB6;PCDHB14;PCDHB13;PCDHB4;PCDHB10;PCDHB9;CDH19                                                                       |
| chemical synaptic transmission (GO:0007268)                                                   | 14/290  | 3.75E-08 | 5.79E-06         | -1.349  | 23.061         | KCNIP2;NRXN1;GRIK3;PCDHB14;PCDHB13;PCDHB12;PCDHB10;CACNB2;DLG2;PCDHB6;KCNMB4;PCDHB4;HAP1;PCDHB9                          |
| anterograde trans-synaptic signaling (GO:0098916)                                             | 13/241  | 3.21E-08 | 5.79E-06         | -1.206  | 20.817         | KCNIP2;NRXN1;PCDHB14;PCDHB13;PCDHB12;PCDHB10;CACNB2;DLG2;PCDHB6;KCNMB4;PCDHB4;HAP1;PCDHB9                                |
| cell-cell adhesion via plasma-membrane adhesion molecules (GO:0098742)                        | 10/143  | 1.19E-07 | 1.54E-05         | -1.174  | 18.721         | ROBO2;TENM3;AMIGO2;PCDHB6;PCDHB14;PCDHB13;PCDHB4;PCDHB10;PCDHB9;CDH19                                                    |
| positive regulation of synaptic transmission (GO:0050806)                                     | 6/68    | 1.16E-05 | 1.28E-03         | -1.419  | 16.128         | RIMS2;SLC24A2;SLC8A3;RIMS4;NRXN1;HAP1                                                                                    |
| homophilic cell adhesion via plasma membrane adhesion molecules (GO:0007156)                  | 5/65    | 1.24E-04 | 1.20E-02         | -1.399  | 12.585         | ROBO2;TENM3;AMIGO2;PCDHB6;CDH19                                                                                          |

Table 2B. Reactome pathways of the genes higher expressed with age

| Term                                         | Overlap | P-value  | Adjusted P-value | Z-score | Combined Score | Genes                                                |
|----------------------------------------------|---------|----------|------------------|---------|----------------|------------------------------------------------------|
| Muscle contraction_Homo sapiens_R-HSA-397014 | 8/196   | 1.13E-04 | 3.17E-02         | -2.100  | 19.085         | TMOD1;SLC8A3;CACNB2;KCNIP2;TMOD2;TBX5;CACNA2D3;TNNI2 |
| cGMP effects_Homo sapiens_R-HSA-418457       | 3/18    | 3.05E-04 | 4.28E-02         | -1.955  | 15.828         | KCNMB4;PRKG2;PDE5A                                   |

Table 2C. Biological processes of the genes lower expressed with age

| Term                                                                   | Overlap | P-value  | Adjusted P-value | Z-score | Combined Score | Genes                                                                              |
|------------------------------------------------------------------------|---------|----------|------------------|---------|----------------|------------------------------------------------------------------------------------|
| regulation of mitotic cell cycle phase transition (GO:1901990)         | 11/185  | 5.62E-08 | 2.99E-05         | -1.919  | 32.031         | CDC20;CENPE;TPX2;CENPF;UBE2C;PSME4;E2F1;KIF14;BUB1B;KNTC1;PTPN6                    |
| DNA metabolic process (GO:0006259)                                     | 14/315  | 3.28E-08 | 2.99E-05         | -1.364  | 23.499         | TOP2A;HELLS;BLM;RMI2;FANCA;MCM10;BRCA2;BRIP1;ORC1;FANCD2;CHEK1;PSME4;TIMELESS;MCM5 |
| mitotic nuclear division (GO:0140014)                                  | 7/75    | 7.77E-07 | 9.19E-05         | -2.222  | 31.254         | TPX2;ESPL1;KIFC1;UBE2C;NUSAP1;MYBL2;KIF11                                          |
| DNA repair (GO:0006281)                                                | 12/289  | 6.80E-07 | 9.19E-05         | -1.706  | 24.220         | BLM;BRIP1;RMI2;DTX3L;FANCD2;RFWD3;CHEK1;PSME4;FANCA;TIMELESS;HMGA2;BRCA2           |
| microtubule cytoskeleton organization involved in mitosis (GO:1902850) | 6/45    | 5.80E-07 | 9.19E-05         | -1.645  | 23.622         | CENPE;ESPL1;NUSAP1;TACC3;KIF11;AURKB                                               |
| mitotic spindle assembly (GO:0090307)                                  | 6/47    | 7.56E-07 | 9.19E-05         | -1.482  | 20.889         | TPX2;KIFC1;KIF23;MYBL2;KIF11;AURKB                                                 |
| cellular response to DNA damage stimulus (GO:0006974)                  | 13/330  | 4.16E-07 | 9.19E-05         | -1.348  | 19.800         | TOP2A;BLM;DTX3L;FANCA;MCM10;BRIP1;DTL;FANCD2;RFWD3;CHEK1;PSME4;E2F1;TIMELESS       |
| mitotic spindle organization (GO:0007052)                              | 7/75    | 7.77E-07 | 9.19E-05         | -1.386  | 19.493         | CENPE;TPX2;KIFC1;KIF23;MYBL2;KIF11;AURKB                                           |
| cytoskeleton-dependent cytokinesis (GO:0061640)                        | 7/71    | 5.33E-07 | 9.19E-05         | -1.243  | 17.959         | ESPL1;NUSAP1;KIF23;NOX5;BRCA2;AURKB;CIT                                            |
| mitotic sister chromatid segregation (GO:0000070)                      | 7/83    | 1.55E-06 | 1.65E-04         | -1.364  | 18.243         | CENPE;ESPL1;KIFC1;KIF14;NUSAP1;KIF23;NCAPH                                         |
| DNA replication (GO:0006260)                                           | 8/121   | 1.75E-06 | 1.70E-04         | -1.546  | 20.491         | BLM;BRIP1;RMI2;ORC1;CHEK1;TIMELESS;MCM10;MCM5                                      |
| centromere complex assembly (GO:0034508)                               | 5/37    | 4.94E-06 | 4.38E-04         | -1.699  | 20.753         | CENPE;CENPU;HELLS;CENPF;HJURP                                                      |
| positive regulation of cell cycle process (GO:0090068)                 | 7/108   | 9.07E-06 | 7.42E-04         | -1.248  | 14.487         | INSR;KIF14;NUSAP1;HMGA2;KIF23;AURKB;CIT                                            |
| regulation of mitotic nuclear division (GO:0007088)                    | 6/85    | 2.49E-05 | 1.66E-03         | -1.377  | 14.600         | INSR;CHEK1;NUSAP1;KNTC1;KIF11;MKI67                                                |
| complement activation, classical pathway (GO:0006958)                  | 7/124   | 2.24E-05 | 1.66E-03         | -1.068  | 11.436         | IGLV3-25;IGHV3-21;IGHV4-34;IGHD;IGKV3-15;IGLV3-1;IGKV3-11                          |

Table 2C (Continued)

| Term                                                                                           | Overlap | P-value  | Adjusted P-value | Z-score | Combined Score | Genes                                                                 |
|------------------------------------------------------------------------------------------------|---------|----------|------------------|---------|----------------|-----------------------------------------------------------------------|
| humoral immune response mediated by circulating immunoglobulin (GO:0002455)                    | 7/126   | 2.48E-05 | 1.66E-03         | -1.036  | 10.988         | IGLV3-25;IGHV3-21;IGHV4-34;IGHD;IGKV3-15;IGLV3-1;IGKV3-11             |
| strand displacement (GO:0000732)                                                               | 4/27    | 3.18E-05 | 1.99E-03         | -2.577  | 26.685         | BLM;BRIP1;RMI2;BRCA2                                                  |
| antigen processing and presentation of exogenous peptide antigen via MHC class II (GO:0019886) | 6/98    | 5.58E-05 | 2.73E-03         | -1.955  | 19.146         | CENPE;HLA-DMA;KIF23;KIF11;HLA-DOA;KIF15                               |
| antigen processing and presentation of exogenous peptide antigen (GO:0002478)                  | 6/98    | 5.58E-05 | 2.73E-03         | -1.886  | 18.475         | CENPE;HLA-DMA;KIF23;KIF11;HLA-DOA;KIF15                               |
| antigen processing and presentation of peptide antigen via MHC class II (GO:0002495)           | 6/99    | 5.91E-05 | 2.73E-03         | -1.834  | 17.856         | CENPE;HLA-DMA;KIF23;KIF11;HLA-DOA;KIF15                               |
| regulation of chromosome segregation (GO:0051983)                                              | 4/30    | 4.89E-05 | 2.73E-03         | -1.708  | 16.954         | RMI2;MKI67;BUB1;AURKB                                                 |
| mitotic cytokinesis (GO:0000281)                                                               | 5/60    | 5.46E-05 | 2.73E-03         | -1.393  | 13.672         | ESPL1;NUSAP1;KIF23;BRCA2;CIT                                          |
| regulation of immune response (GO:0050776)                                                     | 9/252   | 5.78E-05 | 2.73E-03         | -1.271  | 12.403         | IGLV3-25;BTN2A2;BTN3A1;IGHV4-34;HLA-B;IGKV3-15;IGLV3-1;HLA-F;IGKV3-11 |
| sister chromatid segregation (GO:0000819)                                                      | 4/33    | 7.18E-05 | 3.06E-03         | -2.019  | 19.264         | TOP2A;ESPL1;KIFC1;NUSAP1                                              |
| G2 DNA damage checkpoint (GO:0031572)                                                          | 4/33    | 7.18E-05 | 3.06E-03         | -1.660  | 15.843         | BLM;CHEK1;HMGAA2;DTL                                                  |
| DNA synthesis involved in DNA repair (GO:0000731)                                              | 5/66    | 8.65E-05 | 3.54E-03         | -1.298  | 12.145         | BLM;BRIP1;RMI2;BRCA2;DTL                                              |
| positive regulation of cytokinesis (GO:0032467)                                                | 4/35    | 9.09E-05 | 3.58E-03         | -1.596  | 14.853         | KIF14;KIF23;AURKB;CIT                                                 |
| interferon-gamma-mediated signaling pathway (GO:0060333)                                       | 5/71    | 1.23E-04 | 4.66E-03         | -1.295  | 11.659         | HCK;STAT1;OAS3;HLA-B;HLA-F                                            |
| regulation of mitotic sister chromatid separation (GO:0010965)                                 | 3/16    | 1.61E-04 | 5.37E-03         | -2.425  | 21.173         | CENPE;UBE2C;TACC3                                                     |
| regulation of mitotic metaphase/anaphase transition (GO:0030071)                               | 3/16    | 1.61E-04 | 5.37E-03         | -2.335  | 20.391         | CENPE;ESPL1;UBE2C                                                     |
| cellular response to interferon-gamma (GO:0071346)                                             | 6/117   | 1.49E-04 | 5.37E-03         | -1.955  | 17.224         | HCK;STAT1;OAS3;HLA-B;LGALS9;HLA-F                                     |
| DNA biosynthetic process (GO:0071897)                                                          | 4/40    | 1.55E-04 | 5.37E-03         | -1.947  | 17.082         | BLM;BRIP1;RMI2;BRCA2                                                  |

Table 2C (Continued)

| Term                                                                      | Overlap | P-value  | Adjusted P-value | Z-score | Combined Score | Genes                                                                          |
|---------------------------------------------------------------------------|---------|----------|------------------|---------|----------------|--------------------------------------------------------------------------------|
| positive regulation of cell division (GO:0051781)                         | 4/42    | 1.87E-04 | 6.04E-03         | -2.049  | 17.588         | KIF14;KIF23;AURKB;CIT                                                          |
| mitotic spindle checkpoint (GO:0071174)                                   | 3/18    | 2.33E-04 | 6.70E-03         | -2.006  | 16.783         | CENPF;BUB1B;BUB1                                                               |
| mitotic spindle assembly checkpoint (GO:0007094)                          | 3/18    | 2.33E-04 | 6.70E-03         | -1.997  | 16.708         | CENPF;BUB1B;BUB1                                                               |
| spindle assembly checkpoint (GO:0071173)                                  | 3/18    | 2.33E-04 | 6.70E-03         | -1.967  | 16.453         | CENPF;BUB1B;BUB1                                                               |
| anaphase-promoting complex-dependent catabolic process (GO:0031145)       | 5/80    | 2.16E-04 | 6.70E-03         | -1.450  | 12.244         | CDC20;UBE2C;PSME4;BUB1B;AURKB                                                  |
| metaphase plate congression (GO:0051310)                                  | 4/45    | 2.46E-04 | 6.87E-03         | -1.392  | 11.568         | CENPE;CENPF;KIFC1;KIF14                                                        |
| Fc-gamma receptor signaling pathway involved in phagocytosis (GO:0038096) | 6/134   | 3.12E-04 | 8.50E-03         | -1.183  | 9.550          | HCK;IGLV3-25;IGHV4-34;IGKV3-15;IGLV3-1; IGKV3-11                               |
| Fc-gamma receptor signaling pathway (GO:0038094)                          | 6/135   | 3.24E-04 | 8.63E-03         | -2.012  | 16.163         | HCK;IGLV3-25;IGHV4-34;IGKV3-15;IGLV3-1; IGKV3-11                               |
| Fc receptor mediated stimulatory signaling pathway (GO:0002431)           | 6/136   | 3.37E-04 | 8.76E-03         | -1.160  | 9.272          | HCK;IGLV3-25;IGHV4-34;IGKV3-15;IGLV3-1; IGKV3-11                               |
| regulation of signal transduction by p53 class mediator (GO:1901796)      | 6/139   | 3.79E-04 | 9.39E-03         | -1.426  | 11.235         | TPX2;BLM;BRIP1;RMI2;CHEK1;AURKB                                                |
| response to cytokine (GO:0034097)                                         | 6/139   | 3.79E-04 | 9.39E-03         | -1.246  | 9.818          | STAT1;LAMP3;PTPN6;LGALS9;TNFRSF11A; JAK3                                       |
| cytokine-mediated signaling pathway (GO:0019221)                          | 13/634  | 3.94E-04 | 9.52E-03         | -1.306  | 10.239         | STAT1;HLA-B;TNFRSF11A;HLA-F;LMNB1;CXCL10; HCK;AIM2;OAS3;IL2RB;PSME4;PTPN6;JAK3 |
| positive regulation of defense response to virus by host (GO:0002230)     | 3/22    | 4.31E-04 | 9.97E-03         | -2.136  | 16.554         | AIM2;DTX3L;STAT1                                                               |
| peptidyl-tyrosine modification (GO:0018212)                               | 4/52    | 4.30E-04 | 9.97E-03         | -1.799  | 13.946         | HCK;INSR;PTPN6;JAK3                                                            |
| regulation of interferon-gamma-mediated signaling pathway (GO:0060334)    | 3/23    | 4.93E-04 | 1.12E-02         | -2.154  | 16.405         | STAT1;NLRC5;PARP14                                                             |
| chromosome condensation (GO:0030261)                                      | 3/24    | 5.61E-04 | 1.24E-02         | -1.779  | 13.318         | TOP2A;NUSAP1;NCAPH                                                             |
| DNA recombination (GO:0006310)                                            | 4/56    | 5.71E-04 | 1.24E-02         | -1.569  | 11.716         | BLM;BRIP1;RMI2;BRCA2                                                           |
| regulation of cell cycle G1/S phase transition (GO:1902806)               | 3/25    | 6.34E-04 | 1.35E-02         | -2.125  | 15.646         | E2F1;KIF14;PTPN6                                                               |

Table 2C (Continued)

| Term                                                                                       | Overlap | P-value  | Adjusted P-value | Z-score | Combined Score | Genes                                              |
|--------------------------------------------------------------------------------------------|---------|----------|------------------|---------|----------------|----------------------------------------------------|
| regulation of transcription involved in G1/S transition of mitotic cell cycle (GO:0000083) | 3/27    | 7.98E-04 | 1.63E-02         | -1.885  | 13.443         | RRM2;ORC1;E2F1                                     |
| G1/S transition of mitotic cell cycle (GO:0000082)                                         | 5/106   | 7.90E-04 | 1.63E-02         | -1.165  | 8.319          | RRM2;ORC1;E2F1;MCM10;MCM5                          |
| centromeric sister chromatid cohesion (GO:0070601)                                         | 2/7     | 9.43E-04 | 1.76E-02         | -3.783  | 26.354         | BUB1B;BUB1                                         |
| histone-serine phosphorylation (GO:0035404)                                                | 2/7     | 9.43E-04 | 1.76E-02         | -2.915  | 20.307         | HMGA2;AURKB                                        |
| regulation of protein activation cascade (GO:2000257)                                      | 5/109   | 8.96E-04 | 1.76E-02         | -1.980  | 13.896         | IGLV3-25;IGHV4-34;IGKV3-15;IGLV3-1;IGKV3-11        |
| cellular macromolecule biosynthetic process (GO:0034645)                                   | 9/368   | 9.45E-04 | 1.76E-02         | -1.686  | 11.743         | BLM;BRIP1;RMI2;ORC1;CHEK1;E2F1;TIMELESS;MCM10;MCM5 |
| regulation of complement activation (GO:0030449)                                           | 5/110   | 9.34E-04 | 1.76E-02         | -1.316  | 9.183          | IGLV3-25;IGHV4-34;IGKV3-15;IGLV3-1;IGKV3-11        |
| antigen processing and presentation of peptide antigen via MHC class I (GO:0002474)        | 3/29    | 9.87E-04 | 1.81E-02         | -1.708  | 11.823         | HLA-B;TAP1;HLA-F                                   |
| type I interferon signaling pathway (GO:0060337)                                           | 4/66    | 1.06E-03 | 1.85E-02         | -2.220  | 15.200         | STAT1;OAS3;HLA-B;HLA-F                             |
| regulation of humoral immune response (GO:0002920)                                         | 5/114   | 1.10E-03 | 1.85E-02         | -2.174  | 14.821         | IGLV3-25;IGHV4-34;IGKV3-15;IGLV3-1;IGKV3-11        |
| apoptotic process (GO:0006915)                                                             | 7/232   | 1.06E-03 | 1.85E-02         | -1.946  | 13.328         | ERBB3;ESPL1;CHEK1;GZMB;NOX5;PTPN6;CIT              |
| positive regulation of interleukin-1 secretion (GO:0050716)                                | 3/30    | 1.09E-03 | 1.85E-02         | -1.721  | 11.737         | AIM2;IGHD;LGALS9                                   |
| cellular response to type I interferon (GO:0071357)                                        | 4/66    | 1.06E-03 | 1.85E-02         | -1.347  | 9.223          | STAT1;OAS3;HLA-B;HLA-F                             |
| regulation of immune effector process (GO:0002697)                                         | 5/115   | 1.14E-03 | 1.89E-02         | -2.762  | 18.719         | IGLV3-25;IGHV4-34;IGKV3-15;IGLV3-1;IGKV3-11        |
| replication fork processing (GO:0031297)                                                   | 3/31    | 1.20E-03 | 1.94E-02         | -2.085  | 14.018         | BLM;RFWD3;BRCA2                                    |
| regulation of defense response to virus by host (GO:0050691)                               | 3/31    | 1.20E-03 | 1.94E-02         | -1.775  | 11.937         | AIM2;DTX3L;STAT1                                   |



Table 2C (Continued)

| Term                                                                                                         | Overlap | P-value  | Adjusted P-value | Z-score | Combined Score | Genes                                             |
|--------------------------------------------------------------------------------------------------------------|---------|----------|------------------|---------|----------------|---------------------------------------------------|
| cellular response to hydroxyurea (GO:0072711)                                                                | 2/8     | 1.25E-03 | 1.96E-02         | -3.156  | 21.095         | BLM;TIMELESS                                      |
| replication fork protection (GO:0048478)                                                                     | 2/8     | 1.25E-03 | 1.96E-02         | -2.731  | 18.254         | BLM;TIMELESS                                      |
| response to hydroxyurea (GO:0072710)                                                                         | 2/9     | 1.60E-03 | 2.16E-02         | -3.015  | 19.407         | BLM;TIMELESS                                      |
| regulation of metaphase/anaphase transition of cell cycle (GO:1902099)                                       | 2/9     | 1.60E-03 | 2.16E-02         | -3.000  | 19.312         | CENPE;UBE2C                                       |
| heterochromatin assembly (GO:0031507)                                                                        | 2/9     | 1.60E-03 | 2.16E-02         | -2.757  | 17.744         | HELLS;HMG2                                        |
| kinetochore assembly (GO:0051382)                                                                            | 2/9     | 1.60E-03 | 2.16E-02         | -2.750  | 17.700         | CENPE;CENPF                                       |
| interleukin-21-mediated signaling pathway (GO:0038114)                                                       | 2/9     | 1.60E-03 | 2.16E-02         | -2.684  | 17.275         | STAT1;JAK3                                        |
| chromatin remodeling at centromere (GO:0031055)                                                              | 3/33    | 1.45E-03 | 2.16E-02         | -2.212  | 14.465         | CENPU;HELLS;HJURP                                 |
| cellular response to interleukin-21 (GO:0098757)                                                             | 2/9     | 1.60E-03 | 2.16E-02         | -2.241  | 14.426         | STAT1;JAK3                                        |
| negative regulation of activated T cell proliferation (GO:0046007)                                           | 2/9     | 1.60E-03 | 2.16E-02         | -2.199  | 14.157         | BTN2A2;LGALS9                                     |
| enzyme linked receptor protein signaling pathway (GO:0007167)                                                | 5/121   | 1.43E-03 | 2.16E-02         | -1.681  | 11.013         | HCK;ERBB3;CD7;BLNK;JAK3                           |
| regulation of acute inflammatory response (GO:0002673)                                                       | 5/122   | 1.48E-03 | 2.16E-02         | -1.509  | 9.832          | IGLV3-25;IGHV4-34;IGKV3-15;IGLV3-1;IGKV3-11       |
| Fc-epsilon receptor signaling pathway (GO:0038095)                                                           | 6/183   | 1.59E-03 | 2.16E-02         | -1.158  | 7.459          | IGLV3-25;IGHV4-34;PSME4;IGKV3-15;IGLV3-1;IGKV3-11 |
| Fc receptor signaling pathway (GO:0038093)                                                                   | 6/184   | 1.64E-03 | 2.18E-02         | -1.271  | 8.156          | IGLV3-25;IGHV4-34;PSME4;IGKV3-15;IGLV3-1;IGKV3-11 |
| antigen processing and presentation of exogenous peptide antigen via MHC class I, TAP-dependent (GO:0002479) | 4/76    | 1.80E-03 | 2.36E-02         | -1.207  | 7.629          | PSME4;HLA-B;TAP1;HLA-F                            |
| DNA-dependent DNA replication maintenance of fidelity (GO:0045005)                                           | 3/36    | 1.86E-03 | 2.40E-02         | -1.883  | 11.835         | BLM;RFWD3;TIMELESS                                |
| regulation of protein processing (GO:0070613)                                                                | 5/129   | 1.89E-03 | 2.40E-02         | -1.727  | 10.829         | IGLV3-25;IGHV4-34;IGKV3-15;IGLV3-1;IGKV3-11       |

Table 2C (Continued)

| Term                                                                                                                          | Overlap | P-value  | Adjusted P-value | Z-score | Combined Score | Genes                                                      |
|-------------------------------------------------------------------------------------------------------------------------------|---------|----------|------------------|---------|----------------|------------------------------------------------------------|
| positive regulation of ubiquitin-protein ligase activity involved in regulation of mitotic cell cycle transition (GO:0051437) | 4/77    | 1.89E-03 | 2.40E-02         | -1.403  | 8.800          | CDC20;UBE2C;PSME4;BUB1B                                    |
| antigen processing and presentation of exogenous peptide antigen via MHC class I, TAP-independent (GO:0002480)                | 2/10    | 1.99E-03 | 2.47E-02         | -2.224  | 13.830         | HLA-B;HLA-F                                                |
| regulation of cytokinesis (GO:0032465)                                                                                        | 4/78    | 1.98E-03 | 2.47E-02         | -2.098  | 13.062         | KIF14;KIF23;AURKB;CIT                                      |
| antigen processing and presentation of exogenous peptide antigen via MHC class I (GO:0042590)                                 | 4/79    | 2.07E-03 | 2.53E-02         | -1.214  | 7.502          | PSME4;HLA-B;TAP1;HLA-F                                     |
| regulation of single stranded viral RNA replication via double stranded DNA intermediate (GO:0045091)                         | 2/11    | 2.43E-03 | 2.55E-02         | -2.608  | 15.707         | TOP2A;HMGA2                                                |
| positive regulation of T cell apoptotic process (GO:0070234)                                                                  | 2/11    | 2.43E-03 | 2.55E-02         | -2.510  | 15.114         | LGALS9;IDO1                                                |
| establishment of spindle localization (GO:0051293)                                                                            | 2/11    | 2.43E-03 | 2.55E-02         | -2.278  | 13.720         | ESPL1;NUSAP1                                               |
| regulation of T cell apoptotic process (GO:0070232)                                                                           | 2/11    | 2.43E-03 | 2.55E-02         | -2.142  | 12.897         | JAK3;IDO1                                                  |
| mitotic DNA damage checkpoint (GO:0044773)                                                                                    | 3/40    | 2.53E-03 | 2.55E-02         | -2.114  | 12.643         | BLM;RFWD3;HMGA2                                            |
| regulation of type I interferon-mediated signaling pathway (GO:0060338)                                                       | 3/40    | 2.53E-03 | 2.55E-02         | -2.047  | 12.239         | STAT1;NLRC5;PTPN6                                          |
| mitotic spindle midzone assembly (GO:0051256)                                                                                 | 2/11    | 2.43E-03 | 2.55E-02         | -1.917  | 11.545         | KIF23;AURKB                                                |
| positive regulation of ubiquitin protein ligase activity (GO:1904668)                                                         | 4/83    | 2.48E-03 | 2.55E-02         | -1.903  | 11.415         | CDC20;UBE2C;PSME4;BUB1B                                    |
| spindle assembly (GO:0051225)                                                                                                 | 4/81    | 2.27E-03 | 2.55E-02         | -1.864  | 11.348         | TPX2;KIFC1;MYBL2;KIF11                                     |
| retrograde vesicle-mediated transport, Golgi to ER (GO:0006890)                                                               | 4/81    | 2.27E-03 | 2.55E-02         | -1.693  | 10.305         | CENPE;KIF23;KIF11;KIF15                                    |
| endocytosis (GO:0006897)                                                                                                      | 7/264   | 2.22E-03 | 2.55E-02         | -1.591  | 9.720          | DENND1C;IGLV3-25;IGHV4-34;IGKV3-15; IGLV3-1;IGKV3-11;MERTK |

Table 2C (Continued)

| Term                                                                    | Overlap | P-value  | Adjusted P-value | Z-score | Combined Score | Genes                                                 |
|-------------------------------------------------------------------------|---------|----------|------------------|---------|----------------|-------------------------------------------------------|
| DNA damage checkpoint (GO:0000077)                                      | 3/39    | 2.35E-03 | 2.55E-02         | -1.528  | 9.247          | BRIP1;CHEK1;E2F1                                      |
| negative regulation of G0 to G1 transition (GO:0070317)                 | 3/38    | 2.18E-03 | 2.55E-02         | -1.474  | 9.035          | RRM2;CHEK1;E2F1                                       |
| positive regulation of cell proliferation (GO:0008284)                  | 9/425   | 2.53E-03 | 2.55E-02         | -1.430  | 8.548          | HCK;STAT1;INSR;SIRPG;E2F1;KIF14;HMGA2;PTPN6;TNFRSF11A |
| regulation of G0 to G1 transition (GO:0070316)                          | 3/40    | 2.53E-03 | 2.55E-02         | -1.411  | 8.437          | RRM2;CHEK1;E2F1                                       |
| peptidyl-tyrosine phosphorylation (GO:0018108)                          | 4/80    | 2.17E-03 | 2.55E-02         | -1.361  | 8.349          | HCK;INSR;PTPN6;JAK3                                   |
| DNA replication-independent nucleosome assembly (GO:0006336)            | 3/40    | 2.53E-03 | 2.55E-02         | -1.391  | 8.317          | CENPU;HJURP;ASF1B                                     |
| negative regulation of cell cycle process (GO:0010948)                  | 4/82    | 2.37E-03 | 2.55E-02         | -1.331  | 8.043          | RRM2;CHEK1;E2F1;AURKB                                 |
| positive regulation of transferase activity (GO:0051347)                | 5/138   | 2.54E-03 | 2.55E-02         | -1.145  | 6.839          | DTX3L;ERBB3;INSR;MERTK;AURKB                          |
| positive regulation of mitotic cell cycle phase transition (GO:1901992) | 3/41    | 2.71E-03 | 2.67E-02         | -1.737  | 10.266         | ESPL1;UBE2C;DTL                                       |
| positive regulation of mitotic nuclear division (GO:0045840)            | 3/41    | 2.71E-03 | 2.67E-02         | -1.603  | 9.475          | UBE2C;INSR;NUSAP1                                     |
| cellular response to interleukin-2 (GO:0071352)                         | 2/12    | 2.90E-03 | 2.69E-02         | -2.496  | 14.588         | IL2RB;JAK3                                            |
| negative regulation of cell division (GO:0051782)                       | 2/12    | 2.90E-03 | 2.69E-02         | -2.340  | 13.678         | BLM;AURKB                                             |
| mitotic spindle elongation (GO:0000022)                                 | 2/12    | 2.90E-03 | 2.69E-02         | -2.326  | 13.596         | KIF23;AURKB                                           |
| regulation of mitotic centrosome separation (GO:0046602)                | 2/12    | 2.90E-03 | 2.69E-02         | -2.301  | 13.448         | CHEK1;KIF11                                           |
| interleukin-2-mediated signaling pathway (GO:0038110)                   | 2/12    | 2.90E-03 | 2.69E-02         | -1.860  | 10.869         | IL2RB;JAK3                                            |
| double-strand break repair (GO:0006302)                                 | 5/142   | 2.88E-03 | 2.69E-02         | -1.811  | 10.598         | BLM;BRIP1;DTX3L;RFWD3;BRCA2                           |
| regulation of phagocytosis (GO:0050764)                                 | 3/42    | 2.91E-03 | 2.69E-02         | -1.587  | 9.267          | HCK;SIRPG;MERTK                                       |

Table 2C (Continued)

| Term                                                                                                                 | Overlap | P-value  | Adjusted P-value | Z-score | Combined Score | Genes                      |
|----------------------------------------------------------------------------------------------------------------------|---------|----------|------------------|---------|----------------|----------------------------|
| positive regulation of protein ubiquitination involved in ubiquitin-dependent protein catabolic process (GO:2000060) | 4/88    | 3.07E-03 | 2.81E-02         | -1.759  | 10.178         | CDC20;UBE2C;PSME4;BUB1B    |
| positive regulation of interleukin-1 production (GO:0032732)                                                         | 2/13    | 3.41E-03 | 2.95E-02         | -2.576  | 14.637         | AIM2;IGHD                  |
| protein localization to kinetochore (GO:0034501)                                                                     | 2/13    | 3.41E-03 | 2.95E-02         | -2.556  | 14.522         | BUB1B;AURKB                |
| kinetochore organization (GO:0051383)                                                                                | 2/13    | 3.41E-03 | 2.95E-02         | -2.490  | 14.147         | CENPE;CENPF                |
| regulation of sister chromatid cohesion (GO:0007063)                                                                 | 2/13    | 3.41E-03 | 2.95E-02         | -2.438  | 13.849         | ESPL1;BUB1                 |
| signal transduction involved in G2 DNA damage checkpoint (GO:0072425)                                                | 2/13    | 3.41E-03 | 2.95E-02         | -2.302  | 13.079         | CHEK1;DTL                  |
| regulation of double-strand break repair via nonhomologous end joining (GO:2001032)                                  | 2/13    | 3.41E-03 | 2.95E-02         | -2.055  | 11.675         | DTX3L;HMGA2                |
| mitotic metaphase plate congression (GO:0007080)                                                                     | 3/44    | 3.32E-03 | 2.95E-02         | -1.723  | 9.832          | CENPE;KIFC1;KIF14          |
| regulation of cell cycle process (GO:0010564)                                                                        | 4/91    | 3.46E-03 | 2.97E-02         | -1.449  | 8.209          | RMI2;HMGA2;MKI67;AURKB     |
| regulation of G2/M transition of mitotic cell cycle (GO:0010389)                                                     | 5/150   | 3.64E-03 | 3.10E-02         | -1.605  | 9.014          | TPX2;CENPF;PSME4;KIF14;DTL |
| cellular response to interleukin-15 (GO:0071350)                                                                     | 2/14    | 3.96E-03 | 3.27E-02         | -2.332  | 12.901         | IL2RB;JAK3                 |
| establishment of chromosome localization (GO:0051303)                                                                | 2/14    | 3.96E-03 | 3.27E-02         | -2.237  | 12.374         | CENPE;CENPF                |
| signal transduction involved in DNA damage checkpoint (GO:0072422)                                                   | 2/14    | 3.96E-03 | 3.27E-02         | -2.193  | 12.129         | CHEK1;DTL                  |
| interleukin-15-mediated signaling pathway (GO:0035723)                                                               | 2/14    | 3.96E-03 | 3.27E-02         | -1.575  | 8.714          | IL2RB;JAK3                 |
| regulation of G1/S transition of mitotic cell cycle (GO:2000045)                                                     | 3/47    | 4.01E-03 | 3.28E-02         | -1.871  | 10.328         | E2F1;KIF14;PTPN6           |
| interstrand cross-link repair (GO:0036297)                                                                           | 3/49    | 4.51E-03 | 3.66E-02         | -1.596  | 8.623          | FANCD2;RFWD3;FANCA         |

Table 2C (Continued)

| Term                                                                        | Overlap | P-value  | Adjusted P-value | Z-score | Combined Score | Genes                       |
|-----------------------------------------------------------------------------|---------|----------|------------------|---------|----------------|-----------------------------|
| cellular response to nitrogen compound (GO:1901699)                         | 2/15    | 4.55E-03 | 3.67E-02         | -2.262  | 12.198         | BLM;TIMELESS                |
| protein localization to chromosome, centromeric region (GO:0071459)         | 2/16    | 5.17E-03 | 4.01E-02         | -2.474  | 13.023         | BUB1B;AURKB                 |
| negative regulation of DNA-dependent DNA replication (GO:2000104)           | 2/16    | 5.17E-03 | 4.01E-02         | -2.081  | 10.957         | BLM;TIMELESS                |
| regulation of exit from mitosis (GO:0007096)                                | 2/16    | 5.17E-03 | 4.01E-02         | -2.003  | 10.544         | UBE2C;KNTC1                 |
| mitotic chromosome condensation (GO:0007076)                                | 2/16    | 5.17E-03 | 4.01E-02         | -1.807  | 9.513          | NUSAP1;NCAPH                |
| positive regulation of double-strand break repair (GO:2000781)              | 2/16    | 5.17E-03 | 4.01E-02         | -1.468  | 7.727          | DTX3L;TIMELESS              |
| regulation of kinase activity (GO:0043549)                                  | 4/102   | 5.20E-03 | 4.01E-02         | -1.226  | 6.447          | ERBB3;INSR;NLR5;MERTK       |
| B cell differentiation (GO:0030183)                                         | 3/53    | 5.62E-03 | 4.27E-02         | -1.352  | 7.004          | CD79A;BLNK;JAK3             |
| regulation of DNA binding (GO:0051101)                                      | 3/53    | 5.62E-03 | 4.27E-02         | -1.233  | 6.386          | E2F1;HJURP;HMGA2            |
| neuron apoptotic process (GO:0051402)                                       | 2/17    | 5.84E-03 | 4.41E-02         | -2.167  | 11.148         | ERBB3;CIT                   |
| positive regulation of phosphatidylinositol 3-kinase signaling (GO:0014068) | 3/54    | 5.92E-03 | 4.44E-02         | -1.451  | 7.442          | ERBB3;PTPN6;PIK3API         |
| cellular response to inorganic substance (GO:0071241)                       | 2/18    | 6.54E-03 | 4.83E-02         | -2.196  | 11.044         | BLM;TIMELESS                |
| mitotic G2 DNA damage checkpoint (GO:0007095)                               | 2/18    | 6.54E-03 | 4.83E-02         | -1.880  | 9.457          | BLM;HMGA2                   |
| positive regulation of protein kinase activity (GO:0045860)                 | 5/173   | 6.62E-03 | 4.86E-02         | -1.231  | 6.177          | CENPE;TPX2;ERBB3;INSR;KIF14 |
| chromosome organization (GO:0051276)                                        | 3/57    | 6.88E-03 | 4.98E-02         | -1.487  | 7.405          | TOP2A;HMGA2;BRCA2           |
| DNA-dependent DNA replication (GO:0006261)                                  | 3/57    | 6.88E-03 | 4.98E-02         | -1.437  | 7.154          | GIN51;ORC1;MCM10            |

Table 2D. Reactome pathways of the genes lower expressed with age

| Term                                                      | Overlap | P-value  | Adjusted P-value | Z-score | Combined Score | Genes                                                                                                                                                                                                       |
|-----------------------------------------------------------|---------|----------|------------------|---------|----------------|-------------------------------------------------------------------------------------------------------------------------------------------------------------------------------------------------------------|
| Cell Cycle_Homo sapiens_R-HSA-1640170                     | 34/566  | 7.60E-23 | 3.40E-20         | -2.461  | 125.347        | TOP2A;BLM;HIST1H2BL;HJURP;CASC5;BUB1B;MCM10;BRCA2;NCAPH;AURKB;LMNB1;CDC20;BRIP1;ORC1;CHEK1;E2F1;MYBL2;KNTC1;WHSC1;BUB1;GINS1;CENPU;RMI2;RRM2;NUP210;UBE2C;HIST1H2AJ;KIF23;CENPE;TPX2;CENPF;ESPL1;PSME4;MCM5 |
| Cell Cycle, Mitotic_Homo sapiens_R-HSA-69278              | 27/462  | 7.08E-18 | 1.58E-15         | -2.468  | 97.462         | TOP2A;HIST1H2BL;CASC5;BUB1B;MCM10;NCAPH;AURKB;LMNB1;CDC20;ORC1;E2F1;MYBL2;KNTC1;BUB1;GINS1;CENPU;RRM2;NUP210;UBE2C;HIST1H2AJ;KIF23;CENPE;TPX2;CENPF;ESPL1;PSME4;MCM5                                        |
| M Phase_Homo sapiens_R-HSA-68886                          | 18/268  | 3.26E-13 | 4.86E-11         | -2.432  | 69.927         | CENPU;NUP210;UBE2C;HIST1H2BL;HIST1H2AJ;BUB1B;CASC5;KIF23;NCAPH;AURKB;LMNB1;CDC20;CENPE;CENPF;ESPL1;PSME4;KNTC1;BUB1                                                                                         |
| Mitotic Anaphase_Homo sapiens_R-HSA-68882                 | 13/173  | 1.85E-10 | 1.66E-08         | -2.323  | 52.054         | CENPU;UBE2C;BUB1B;CASC5;AURKB;LMNB1;CDC20;CENPE;CENPF;ESPL1;PSME4;KNTC1;BUB1                                                                                                                                |
| Mitotic Metaphase and Anaphase_Homo sapiens_R-HSA-2555396 | 13/174  | 1.99E-10 | 1.66E-08         | -2.317  | 51.748         | CENPU;UBE2C;BUB1B;CASC5;AURKB;LMNB1;CDC20;CENPE;CENPF;ESPL1;PSME4;KNTC1;BUB1                                                                                                                                |
| RHO GTPase Effectors_Homo sapiens_R-HSA-195258            | 15/255  | 2.22E-10 | 1.66E-08         | -2.225  | 49.463         | CENPU;HIST1H2BL;HIST1H2AJ;KIF14;BUB1B;CASC5;IQGAP3;AURKB;CIT;CDC20;CENPE;CENPF;DIAPH3;KNTC1;BUB1                                                                                                            |
| Cell Cycle Checkpoints_Homo sapiens_R-HSA-69620           | 13/182  | 3.48E-10 | 2.23E-08         | -2.316  | 50.445         | BLM;RMI2;UBE2C;HIST1H2BL;BUB1B;MCM10;CDC20;BRIP1;ORC1;CHEK1;PSME4;MCM5;WHSC1                                                                                                                                |
| Signaling by Rho GTPases_Homo sapiens_R-HSA-194315        | 17/367  | 5.32E-10 | 2.98E-08         | -2.149  | 45.885         | ARHGAP11A;CENPU;HIST1H2BL;HIST1H2AJ;KIF14;BUB1B;CASC5;ARHGAP26;IQGAP3;AURKB;CIT;CDC20;CENPE;CENPF;DIAPH3;KNTC1;BUB1                                                                                         |

Table 2D (Continued)

| Term                                                                                                  | Overlap | P-value  | Adjusted P-value | Z-score | Combined Score | Genes                                                                                                                                                                                                |
|-------------------------------------------------------------------------------------------------------|---------|----------|------------------|---------|----------------|------------------------------------------------------------------------------------------------------------------------------------------------------------------------------------------------------|
| Separation of Sister Chromatids_Homo sapiens_R-HSA-2467813                                            | 12/162  | 1.13E-09 | 5.62E-08         | -2.251  | 46.385         | CDC20;CENPU;CENPE;CENPF;ESPL1;UBE2C;PSME4;BUB1B;CASC5;KNTC1;BUB1;AURKB                                                                                                                               |
| Mitotic Prometaphase_Homo sapiens_R-HSA-68877                                                         | 10/107  | 3.04E-09 | 1.36E-07         | -1.974  | 38.714         | CDC20;CENPU;CENPE;CENPF;BUB1B;CASC5;KNTC1;BUB1;NCAPH;AURKB                                                                                                                                           |
| RHO GTPases Activate Formins_Homo sapiens_R-HSA-5663220                                               | 10/114  | 5.65E-09 | 2.30E-07         | -1.945  | 36.929         | CDC20;CENPU;CENPE;CENPF;DIAPH3;BUB1B;CASC5;KNTC1;BUB1;AURKB                                                                                                                                          |
| Immune System_Homo sapiens_R-HSA-168256                                                               | 32/1547 | 9.71E-09 | 3.62E-07         | -2.139  | 39.466         | NLR5;KIF11;TNFRSF11A;KIF15;CDC20;CD79A;IGLV3-25;HLA-DMA;ERBB3;BLNK;LGALS9;HLA-DOA;JAK3;NUP210;DTX3L;UBE2C;STAT1;INSR;HLA-B;TAP1;KIF23;HLA-F;CENPE;HCK;AIM2;OAS3;IL2RB;PSME4;IGHD;TLR10;PTPN6;PIK3AP1 |
| Resolution of Sister Chromatid Cohesion_Homo sapiens_R-HSA-2500257                                    | 9/99    | 2.46E-08 | 8.46E-07         | -1.987  | 34.808         | CDC20;CENPU;CENPE;CENPF;BUB1B;CASC5;KNTC1;BUB1;AURKB                                                                                                                                                 |
| Adaptive Immune System_Homo sapiens_R-HSA-1280218                                                     | 21/762  | 4.74E-08 | 1.52E-06         | -2.173  | 36.643         | DTX3L;UBE2C;INSR;HLA-B;TAP1;KIF23;KIF11;HLA-F;KIF15;CDC20;CENPE;IGLV3-25;CD79A;HLA-DMA;ERBB3;PSME4;IGHD;BLNK;PTPN6;HLA-DOA;PIK3AP1                                                                   |
| G2/M Checkpoints_Homo sapiens_R-HSA-69481                                                             | 10/150  | 7.90E-08 | 2.36E-06         | -2.227  | 36.423         | BLM;BRIP1;RMI2;ORC1;HIST1H2BL;CHEK1;PSME4;MCM5;MCM10;WHSC1                                                                                                                                           |
| HDR through Homologous Recombination (HR) or Single Strand Annealing (SSA)_Homo sapiens_R-HSA-5693567 | 8/112   | 9.76E-07 | 2.73E-05         | -1.914  | 26.496         | BLM;BRIP1;RMI2;HIST1H2BL;CHEK1;TIMELESS;WHSC1;BRCA2                                                                                                                                                  |
| Processing of DNA double-strand break ends_Homo sapiens_R-HSA-5693607                                 | 7/81    | 1.32E-06 | 3.47E-05         | -1.973  | 26.709         | RMI2;BLM;BRIP1;HIST1H2BL;CHEK1;TIMELESS;WHSC1                                                                                                                                                        |
| Homology Directed Repair_Homo sapiens_R-HSA-5693538                                                   | 8/118   | 1.45E-06 | 3.61E-05         | -1.915  | 25.744         | BLM;BRIP1;RMI2;HIST1H2BL;CHEK1;TIMELESS;WHSC1;BRCA2                                                                                                                                                  |
| DNA Repair_Homo sapiens_R-HSA-73894                                                                   | 11/285  | 4.09E-06 | 9.64E-05         | -2.126  | 26.380         | BRIP1;RMI2;BLM;FANCD2;HIST1H2BL;CHEK1;TIMELESS;FANCA;WHSC1;BRCA2;DTL                                                                                                                                 |
| DNA Double-Strand Break Repair_Homo sapiens_R-HSA-5693532                                             | 8/145   | 6.77E-06 | 1.44E-04         | -1.952  | 23.238         | BLM;BRIP1;RMI2;HIST1H2BL;CHEK1;TIMELESS;WHSC1;BRCA2                                                                                                                                                  |

Table 2D (Continued)

| Term                                                                                                           | Overlap | P-value  | Adjusted P-value | Z-score | Combined Score | Genes                                    |
|----------------------------------------------------------------------------------------------------------------|---------|----------|------------------|---------|----------------|------------------------------------------|
| Presynaptic phase of homologous DNA pairing and strand exchange_Homo sapiens_R-HSA-5693616                     | 5/39    | 6.46E-06 | 1.44E-04         | -1.869  | 22.337         | RMI2;BLM;BRIP1;CHEK1;BRCA2               |
| Homologous DNA Pairing and Strand Exchange_Homo sapiens_R-HSA-5693579                                          | 5/42    | 9.39E-06 | 1.91E-04         | -1.874  | 21.694         | RMI2;BLM;BRIP1;CHEK1;BRCA2               |
| Kinesins_Homo sapiens_R-HSA-983189                                                                             | 5/44    | 1.19E-05 | 2.31E-04         | -1.683  | 19.093         | CENPE;KIFC1;KIF23;KIF11;KIF15            |
| G2/M DNA damage checkpoint_Homo sapiens_R-HSA-69473                                                            | 6/78    | 1.52E-05 | 2.84E-04         | -1.957  | 21.709         | RMI2;BLM;BRIP1;HIST1H2BL;CHEK1;WHSC1     |
| Antigen activates B Cell Receptor (BCR) leading to generation of second messengers_Homo sapiens_R-HSA-983695   | 5/47    | 1.65E-05 | 2.95E-04         | -1.652  | 18.200         | CD79A;IGHD;BLNK;PTPN6;PIK3AP1            |
| Deposition of new CENPA-containing nucleosomes at the centromere_Homo sapiens_R-HSA-606279                     | 5/52    | 2.72E-05 | 4.36E-04         | -1.872  | 19.683         | CENPU;HIST1H2BL;HIST1H2AJ;HJURP;CASC5    |
| Nucleosome assembly_Homo sapiens_R-HSA-774815                                                                  | 5/52    | 2.72E-05 | 4.36E-04         | -1.865  | 19.613         | CENPU;HIST1H2BL;HIST1H2AJ;HJURP;CASC5    |
| Resolution of D-loop Structures through Synthesis-Dependent Strand Annealing (SDSA)_Homo sapiens_R-HSA-5693554 | 4/26    | 2.72E-05 | 4.36E-04         | -1.596  | 16.772         | RMI2;BLM;BRIP1;BRCA2                     |
| Regulation of TP53 Activity through Phosphorylation_Homo sapiens_R-HSA-6804756                                 | 6/89    | 3.24E-05 | 5.00E-04         | -1.684  | 17.404         | TPX2;RMI2;BLM;BRIP1;CHEK1;AURKB          |
| Mitotic G1-G1/S phases_Homo sapiens_R-HSA-453279                                                               | 7/136   | 4.05E-05 | 6.05E-04         | -1.892  | 19.135         | TOP2A;RRM2;ORC1;E2F1;MYBL2;MCM5;MCM10    |
| DNA Damage/Telomere Stress Induced Senescence_Homo sapiens_R-HSA-2559586                                       | 5/59    | 5.04E-05 | 7.28E-04         | -1.708  | 16.906         | HIST1H2BL;HIST1H2AJ;HMGA2;HIST1H1A;LMNB1 |
| Resolution of D-loop Structures through Holliday Junction Intermediates_Homo sapiens_R-HSA-5693568             | 4/32    | 6.34E-05 | 8.88E-04         | -1.616  | 15.620         | RMI2;BLM;BRIP1;BRCA2                     |
| MHC class II antigen presentation_Homo sapiens_R-HSA-2132295                                                   | 6/103   | 7.37E-05 | 9.55E-04         | -1.669  | 15.882         | CENPE;HLA-DMA;KIF23;KIF11;HLA-DOA;KIF15  |



Table 2D (Continued)

| Term                                                                                      | Overlap | P-value  | Adjusted P-value | Z-score | Combined Score | Genes                                                                                |
|-------------------------------------------------------------------------------------------|---------|----------|------------------|---------|----------------|--------------------------------------------------------------------------------------|
| Resolution of D-Loop Structures_Homo sapiens_R-HSA-5693537                                | 4/33    | 7.18E-05 | 9.55E-04         | -1.653  | 15.772         | RMI2;BLM;BRIP1;BRCA2                                                                 |
| HDR through Homologous Recombination (HRR)_Homo sapiens_R-HSA-5685942                     | 5/64    | 7.46E-05 | 9.55E-04         | -1.638  | 15.567         | RMI2;BLM;BRIP1;CHEK1;BRCA2                                                           |
| DNA Replication_Homo sapiens_R-HSA-69306                                                  | 6/105   | 8.21E-05 | 1.02E-03         | -1.989  | 18.709         | GIN51;ORC1;PSME4;E2F1;MCM5;MCM10                                                     |
| Cytokine Signaling in Immune system_Homo sapiens_R-HSA-1280215                            | 14/620  | 8.59E-05 | 1.04E-03         | -2.084  | 19.516         | NUP210;STAT1;HLA-B;TNFRSF11A;HLA-F;HCK;ERBB3;OAS3;PSME4;IL2RB;BLNK;PTPN6;LGALS9;JAK3 |
| Interferon alpha/beta signaling_Homo sapiens_R-HSA-909733                                 | 5/68    | 9.98E-05 | 1.18E-03         | -1.506  | 13.871         | STAT1;OAS3;HLA-B;PTPN6;HLA-F                                                         |
| Activation of ATR in response to replication stress_Homo sapiens_R-HSA-176187             | 4/37    | 1.14E-04 | 1.30E-03         | -1.525  | 13.849         | ORC1;CHEK1;MCM5;MCM10                                                                |
| Cellular Senescence_Homo sapiens_R-HSA-2559583                                            | 7/161   | 1.18E-04 | 1.32E-03         | -1.918  | 17.356         | UBE2C;HIST1H2BL;HIST1H2AJ;E2F1;HMGA2;HIST1H1A;LMNB1                                  |
| Regulation of DNA replication_Homo sapiens_R-HSA-69304                                    | 5/75    | 1.59E-04 | 1.74E-03         | -1.930  | 16.883         | ORC1;PSME4;E2F1;MCM5;MCM10                                                           |
| Signaling by the B Cell Receptor (BCR)_Homo sapiens_R-HSA-983705                          | 8/233   | 1.97E-04 | 2.01E-03         | -2.091  | 17.842         | CD79A;ERBB3;INSR;PSME4;IGHD;BLNK;PTPN6;PIK3AP1                                       |
| G1/S-Specific Transcription_Homo sapiens_R-HSA-69205                                      | 3/17    | 1.95E-04 | 2.01E-03         | -1.016  | 8.679          | RRM2;ORC1;E2F1                                                                       |
| Formation of Senescence-Associated Heterochromatin Foci (SAHF)_Homo sapiens_R-HSA-2559584 | 3/17    | 1.95E-04 | 2.01E-03         | -0.994  | 8.487          | HMGA2;HIST1H1A;LMNB1                                                                 |
| DNA Replication Pre-Initiation_Homo sapiens_R-HSA-69002                                   | 5/82    | 2.42E-04 | 2.31E-03         | -1.867  | 15.543         | ORC1;PSME4;E2F1;MCM5;MCM10                                                           |
| M/G1 Transition_Homo sapiens_R-HSA-68874                                                  | 5/82    | 2.42E-04 | 2.31E-03         | -1.858  | 15.467         | ORC1;PSME4;E2F1;MCM5;MCM10                                                           |
| CD22 mediated BCR regulation_Homo sapiens_R-HSA-5690714                                   | 3/18    | 2.33E-04 | 2.31E-03         | -0.850  | 7.107          | CD79A;IGHD;PTPN6                                                                     |
| APC/C-mediated degradation of cell cycle proteins_Homo sapiens_R-HSA-174143               | 5/85    | 2.86E-04 | 2.57E-03         | -1.856  | 15.139         | CDC20;UBE2C;PSME4;BUB1B;AURKB                                                        |

Table 2D (Continued)

| Term                                                                                                                                                  | Overlap | P-value  | Adjusted P-value | Z-score | Combined Score | Genes                                                                                                                                                                                             |
|-------------------------------------------------------------------------------------------------------------------------------------------------------|---------|----------|------------------|---------|----------------|---------------------------------------------------------------------------------------------------------------------------------------------------------------------------------------------------|
| Regulation of mitotic cell cycle_Homo sapiens_R-HSA-453276                                                                                            | 5/85    | 2.86E-04 | 2.57E-03         | -1.836  | 14.981         | CDC20;UBE2C;PSME4;BUB1B;AURKB                                                                                                                                                                     |
| Meiosis_Homo sapiens_R-HSA-1500620                                                                                                                    | 5/85    | 2.86E-04 | 2.57E-03         | -1.583  | 12.916         | BLM;HIST1H2BL;HIST1H2AJ;BRCA2;LMNB1                                                                                                                                                               |
| Chromosome Maintenance_Homo sapiens_R-HSA-73886                                                                                                       | 5/86    | 3.02E-04 | 2.66E-03         | -1.625  | 13.166         | CENPU;HIST1H2BL;HIST1H2AJ;HJURP;CASC5                                                                                                                                                             |
| Inactivation of APC/C via direct inhibition of the APC/C complex_Homo sapiens_R-HSA-141430                                                            | 3/20    | 3.22E-04 | 2.72E-03         | -0.879  | 7.067          | CDC20;UBE2C;BUB1B                                                                                                                                                                                 |
| Inhibition of the proteolytic activity of APC/C required for the onset of anaphase by mitotic spindle checkpoint components_Homo sapiens_R-HSA-141405 | 3/20    | 3.22E-04 | 2.72E-03         | -0.860  | 6.913          | CDC20;UBE2C;BUB1B                                                                                                                                                                                 |
| Mitotic Spindle Checkpoint_Homo sapiens_R-HSA-69618                                                                                                   | 3/21    | 3.74E-04 | 3.10E-03         | -0.918  | 7.247          | CDC20;UBE2C;BUB1B                                                                                                                                                                                 |
| Interferon gamma signaling_Homo sapiens_R-HSA-877300                                                                                                  | 5/93    | 4.35E-04 | 3.54E-03         | -1.333  | 10.319         | STAT1;OAS3;HLA-B;PTPN6;HLA-F                                                                                                                                                                      |
| Signal Transduction_Homo sapiens_R-HSA-162582                                                                                                         | 31/2465 | 4.66E-04 | 3.73E-03         | -1.742  | 13.361         | ARHGAP11A;HIST1H2BL;KIF14;CASC5;BUB1B;IQGAP3;AURKB;CDC20;ERBB3;CHEK1;E2F1;KNTC1;JAK3;BUB1;CD97;CENPU;STAT1;INSR;HIST1H2AJ;GZMB;MYO7A;ARHGAP26;CIT;CENPE;CXCL10;CENPF;KEL;DIAPH3;IL2RB;PSME4;PTPN6 |
| Meiotic recombination_Homo sapiens_R-HSA-912446                                                                                                       | 4/54    | 4.97E-04 | 3.91E-03         | -1.541  | 11.723         | BLM;HIST1H2BL;HIST1H2AJ;BRCA2                                                                                                                                                                     |
| Regulation of TP53 Activity_Homo sapiens_R-HSA-5633007                                                                                                | 6/151   | 5.89E-04 | 4.55E-03         | -1.564  | 11.630         | TPX2;BLM;BRIP1;RMI2;CHEK1;AURKB                                                                                                                                                                   |
| APC-Cdc20 mediated degradation of Nek2A_Homo sapiens_R-HSA-179409                                                                                     | 3/25    | 6.34E-04 | 4.66E-03         | -1.042  | 7.674          | CDC20;UBE2C;BUB1B                                                                                                                                                                                 |
| G0 and Early G1_Homo sapiens_R-HSA-1538133                                                                                                            | 3/25    | 6.34E-04 | 4.66E-03         | -0.903  | 6.648          | TOP2A;E2F1;MYBL2                                                                                                                                                                                  |

Table 2D (Continued)

| Term                                                                                                                               | Overlap | P-value  | Adjusted P-value | Z-score | Combined Score | Genes                                                            |
|------------------------------------------------------------------------------------------------------------------------------------|---------|----------|------------------|---------|----------------|------------------------------------------------------------------|
| Antigen Presentation: Folding, assembly and peptide loading of class I MHC_Homo sapiens_R-HSA-983170                               | 3/25    | 6.34E-04 | 4.66E-03         | -0.861  | 6.341          | HLA-B;TAP1;HLA-F                                                 |
| Cellular responses to stress_Homo sapiens_R-HSA-2262752                                                                            | 9/367   | 9.27E-04 | 6.70E-03         | -1.847  | 12.902         | NUP210;UBE2C;HIST1H2BL;HIST1H2AJ;E2F1;HMGA2;NOX5;HIST1H1A;LMNB1  |
| G1/S Transition_Homo sapiens_R-HSA-69206                                                                                           | 5/112   | 1.01E-03 | 7.09E-03         | -1.604  | 11.060         | RRM2;ORC1;E2F1;MCM5;MCM10                                        |
| ER-Phagosome pathway_Homo sapiens_R-HSA-1236974                                                                                    | 4/65    | 1.00E-03 | 7.09E-03         | -1.520  | 10.495         | PSME4;HLA-B;TAP1;HLA-F                                           |
| Activation of the pre-replicative complex_Homo sapiens_R-HSA-68962                                                                 | 3/30    | 1.09E-03 | 7.52E-03         | -0.954  | 6.505          | ORC1;MCM5;MCM10                                                  |
| Assembly of the pre-replicative complex_Homo sapiens_R-HSA-68867                                                                   | 4/67    | 1.13E-03 | 7.64E-03         | -1.630  | 11.065         | ORC1;PSME4;E2F1;MCM5                                             |
| Signaling by Interleukins_Homo sapiens_R-HSA-449147                                                                                | 9/392   | 1.46E-03 | 9.03E-03         | -1.864  | 12.168         | HCK;ERBB3;STAT1;PSME4;IL2RB;BLNK;PTPN6;LGALS9;JAK3               |
| Hemostasis_Homo sapiens_R-HSA-109582                                                                                               | 11/552  | 1.40E-03 | 9.03E-03         | -1.619  | 10.641         | CENPE;ABCC4;KIFC1;IL2RB;SIRPG;PTPN6;KIF23;KIF11;MERTK;JAK3;KIF15 |
| APC/C:Cdh1 mediated degradation of Cdc20 and other APC/C:Cdh1 targeted proteins in late mitosis/early G1_Homo sapiens_R-HSA-174178 | 4/71    | 1.40E-03 | 9.03E-03         | -1.613  | 10.604         | CDC20;UBE2C;PSME4;AURKB                                          |
| Cdc20:Phospho-APC/C mediated degradation of Cyclin A_Homo sapiens_R-HSA-174184                                                     | 4/71    | 1.40E-03 | 9.03E-03         | -1.565  | 10.285         | CDC20;UBE2C;PSME4;BUB1B                                          |
| APC:Cdc20 mediated degradation of cell cycle proteins prior to satisfaction of the cell cycle checkpoint_Homo sapiens_R-HSA-179419 | 4/72    | 1.47E-03 | 9.03E-03         | -1.558  | 10.164         | CDC20;UBE2C;PSME4;BUB1B                                          |
| Removal of licensing factors from origins_Homo sapiens_R-HSA-69300                                                                 | 4/72    | 1.47E-03 | 9.03E-03         | -1.553  | 10.129         | ORC1;PSME4;MCM5;MCM10                                            |
| E2F mediated regulation of DNA replication_Homo sapiens_R-HSA-113510                                                               | 3/33    | 1.45E-03 | 9.03E-03         | -1.029  | 6.730          | RRM2;ORC1;E2F1                                                   |
| APC/C:Cdc20 mediated degradation of mitotic proteins_Homo sapiens_R-HSA-176409                                                     | 4/74    | 1.63E-03 | 9.86E-03         | -1.552  | 9.965          | CDC20;UBE2C;PSME4;BUB1B                                          |

Table 2D (Continued)

| Term                                                                                                   | Overlap | P-value  | Adjusted P-value | Z-score | Combined Score | Genes                                         |
|--------------------------------------------------------------------------------------------------------|---------|----------|------------------|---------|----------------|-----------------------------------------------|
| Activation of APC/C and APC/C:Cdc20 mediated degradation of mitotic proteins_Homo sapiens_R-HSA-176814 | 4/75    | 1.71E-03 | 1.02E-02         | -1.509  | 9.615          | CDC20;UBE2C;PSME4;BUB1B                       |
| Signaling by SCF-KIT_Homo sapiens_R-HSA-1433557                                                        | 8/325   | 1.74E-03 | 1.02E-02         | -1.877  | 11.925         | ERBB3;STAT1;INSR;CHEK1;PSME4;IL2RB;PTPN6;JAK3 |
| HDR through Single Strand Annealing (SSA)_Homo sapiens_R-HSA-5685938                                   | 3/37    | 2.02E-03 | 1.17E-02         | -1.002  | 6.216          | RMI2;BLM;BRIP1                                |
| Interleukin-3, 5 and GM-CSF signaling_Homo sapiens_R-HSA-512988                                        | 7/261   | 2.08E-03 | 1.18E-02         | -1.827  | 11.283         | HCK;ERBB3;PSME4;IL2RB;BLNK;PTPN6;JAK3         |
| Regulation of APC/C activators between G1/S and early anaphase_Homo sapiens_R-HSA-176408               | 4/79    | 2.07E-03 | 1.18E-02         | -1.503  | 9.290          | CDC20;UBE2C;PSME4;BUB1B                       |
| Interferon Signaling_Homo sapiens_R-HSA-913531                                                         | 6/196   | 2.25E-03 | 1.26E-02         | -1.448  | 8.832          | NUP210;STAT1;OAS3;HLA-B;PTPN6;HLA-F           |
| COPI-dependent Golgi-to-ER retrograde traffic_Homo sapiens_R-HSA-6811434                               | 4/81    | 2.27E-03 | 1.26E-02         | -1.193  | 7.264          | CENPE;KIF23;KIF11;KIF15                       |
| Antigen processing-Cross presentation_Homo sapiens_R-HSA-1236975                                       | 4/82    | 2.37E-03 | 1.30E-02         | -1.358  | 8.206          | PSME4;HLA-B;TAP1;HLA-F                        |
| CDC6 association with the ORC:origin complex_Homo sapiens_R-HSA-68689                                  | 2/11    | 2.43E-03 | 1.31E-02         | 1.671   | -10.064        | ORC1;E2F1                                     |
| Transcriptional Regulation by TP53_Homo sapiens_R-HSA-3700989                                          | 8/348   | 2.65E-03 | 1.42E-02         | -1.613  | 9.566          | TPX2;BRIP1;RMI2;BLM;FANCD2;CHEK1;E2F1;AURKB   |
| Factors involved in megakaryocyte development and platelet production_Homo sapiens_R-HSA-983231        | 5/141   | 2.79E-03 | 1.47E-02         | -1.317  | 7.746          | CENPE;KIFC1;KIF23;KIF11;KIF15                 |
| Endosomal/Vacuolar pathway_Homo sapiens_R-HSA-1236977                                                  | 2/12    | 2.90E-03 | 1.49E-02         | 1.307   | -7.638         | HLA-B;HLA-F                                   |
| Unwinding of DNA_Homo sapiens_R-HSA-176974                                                             | 2/12    | 2.90E-03 | 1.49E-02         | 1.753   | -10.246        | GINS1;MCM5                                    |

Table 2D (Continued)

| Term                                                                                       | Overlap | P-value  | Adjusted P-value | Z-score | Combined Score | Genes                                    |
|--------------------------------------------------------------------------------------------|---------|----------|------------------|---------|----------------|------------------------------------------|
| SUMOylation of DNA replication proteins_Homo sapiens_R-HSA-4615885                         | 3/44    | 3.32E-03 | 1.69E-02         | -1.145  | 6.535          | TOP2A;NUP210;AURKB                       |
| Signal regulatory protein (SIRP) family interactions_Homo sapiens_R-HSA-391160             | 2/13    | 3.41E-03 | 1.72E-02         | 0.896   | -5.090         | SIRPG;PTPN6                              |
| Regulation of IFNG signaling_Homo sapiens_R-HSA-877312                                     | 2/14    | 3.96E-03 | 1.97E-02         | 0.715   | -3.955         | STAT1;PTPN6                              |
| SUMO E3 ligases SUMOylate target proteins_Homo sapiens_R-HSA-3108232                       | 4/96    | 4.19E-03 | 2.06E-02         | -1.227  | 6.719          | TOP2A;BLM;NUP210;AURKB                   |
| Synthesis of DNA_Homo sapiens_R-HSA-69239                                                  | 4/97    | 4.35E-03 | 2.12E-02         | -1.454  | 7.905          | GIN51;ORC1;PSME4;MCM5                    |
| Association of licensing factors with the pre-replicative complex_Homo sapiens_R-HSA-69298 | 2/15    | 4.55E-03 | 2.19E-02         | 0.352   | -1.898         | ORC1;E2F1                                |
| Class I MHC mediated antigen processing & presentation_Homo sapiens_R-HSA-983169           | 7/305   | 4.91E-03 | 2.34E-02         | -1.446  | 7.687          | CDC20;DTX3L;UBE2C;PSME4;HLA-B;TAP1;HLA-F |
| Apoptosis_Homo sapiens_R-HSA-109581                                                        | 5/163   | 5.17E-03 | 2.37E-02         | -1.357  | 7.142          | PSME4;E2F1;GZMB;HIST1H1A;LMNB1           |
| SUMOylation_Homo sapiens_R-HSA-2990846                                                     | 4/101   | 5.02E-03 | 2.37E-02         | -1.176  | 6.228          | TOP2A;BLM;NUP210;AURKB                   |
| Polo-like kinase mediated events_Homo sapiens_R-HSA-156711                                 | 2/16    | 5.17E-03 | 2.37E-02         | 0.494   | -2.600         | CENPF;MYBL2                              |
| RHO GTPases activate CIT_Homo sapiens_R-HSA-5625900                                        | 2/16    | 5.17E-03 | 2.37E-02         | 0.502   | -2.642         | KIF14;CIT                                |
| Programmed Cell Death_Homo sapiens_R-HSA-5357801                                           | 5/166   | 5.58E-03 | 2.52E-02         | -1.352  | 7.018          | PSME4;E2F1;GZMB;HIST1H1A;LMNB1           |
| GPVI-mediated activation cascade_Homo sapiens_R-HSA-114604                                 | 3/53    | 5.62E-03 | 2.52E-02         | -0.818  | 4.239          | IL2RB;PTPN6;JAK3                         |
| Mitotic Prophase_Homo sapiens_R-HSA-68875                                                  | 4/107   | 6.15E-03 | 2.73E-02         | -1.239  | 6.305          | NUP210;HIST1H2BL;HIST1H2AJ;LMNB1         |
| Regulation of signaling by CBL_Homo sapiens_R-HSA-912631                                   | 2/18    | 6.54E-03 | 2.87E-02         | 0.330   | -1.659         | HCK;BLNK                                 |
| Golgi-to-ER retrograde transport_Homo sapiens_R-HSA-8856688                                | 4/110   | 6.78E-03 | 2.95E-02         | -1.114  | 5.563          | CENPE;KIF23;KIF11;KIF15                  |

Table 2D (Continued)

| Term                                                                                 | Overlap | P-value  | Adjusted P-value | Z-score | Combined Score | Genes                               |
|--------------------------------------------------------------------------------------|---------|----------|------------------|---------|----------------|-------------------------------------|
| Mitotic G2-G2/M phases_Homo sapiens_R-HSA-453274                                     | 5/175   | 6.94E-03 | 2.96E-02         | -1.341  | 6.665          | TPX2;CENPF;PSME4;E2F1;MYBL2         |
| Meiotic synapsis_Homo sapiens_R-HSA-1221632                                          | 3/57    | 6.88E-03 | 2.96E-02         | -0.889  | 4.425          | HIST1H2BL;HIST1H2AJ;LMNB1           |
| Conversion from APC/C:Cdc20 to APC/C:Cdh1 in late anaphase_Homo sapiens_R-HSA-176407 | 2/19    | 7.28E-03 | 3.08E-02         | 0.382   | -1.879         | CDC20;UBE2C                         |
| Interleukin-2 signaling_Homo sapiens_R-HSA-451927                                    | 6/252   | 7.60E-03 | 3.18E-02         | -1.555  | 7.589          | ERBB3;PSME4;IL2RB;PTPN6;LGALS9;JAK3 |
| S Phase_Homo sapiens_R-HSA-69242                                                     | 4/124   | 1.02E-02 | 4.23E-02         | -1.300  | 5.956          | GIN51;ORC1;PSME4;MCM5               |
| APC/C:Cdc20 mediated degradation of Securin_Homo sapiens_R-HSA-174154                | 3/66    | 1.03E-02 | 4.23E-02         | -1.160  | 5.307          | CDC20;UBE2C;PSME4                   |
| APC/C:Cdc20 mediated degradation of Cyclin B_Homo sapiens_R-HSA-174048               | 2/23    | 1.06E-02 | 4.31E-02         | -0.092  | 0.421          | CDC20;UBE2C                         |
| Growth hormone receptor signaling_Homo sapiens_R-HSA-982772                          | 2/24    | 1.15E-02 | 4.64E-02         | 0.066   | -0.297         | STAT1;PTPN6                         |
| Orc1 removal from chromatin_Homo sapiens_R-HSA-68949                                 | 3/70    | 1.21E-02 | 4.79E-02         | -1.090  | 4.812          | ORC1;PSME4;MCM5                     |
| Switching of origins to a post-replicative state_Homo sapiens_R-HSA-69052            | 3/70    | 1.21E-02 | 4.79E-02         | -1.078  | 4.760          | ORC1;PSME4;MCM5                     |
| Regulation of IFNA signaling_Homo sapiens_R-HSA-912694                               | 2/25    | 1.24E-02 | 4.89E-02         | 0.143   | -0.627         | STAT1;PTPN6                         |

**Supplementary Table 3. Gene ontology and pathway analyses using g:Profiler**

Table 3A. Biological processes of the genes higher expressed with age

| Term                                                                         | Overlap | FDR      | Genes                                                                                                                                                        |
|------------------------------------------------------------------------------|---------|----------|--------------------------------------------------------------------------------------------------------------------------------------------------------------|
| homophilic cell adhesion via plasma membrane adhesion molecules (GO:0007156) | 16/159  | 1.52E-11 | CDH19;PCDHB4;PCDH11X;PCDHB6;PCDHB10;PCDHB14;PCDHB12;AMI(GO2;FAT3;PCDHB9;PCDH9;ROBO2;PCDHB13;TENM3;PCDHGA5;PCDHGA4                                            |
| trans-synaptic signaling (GO:0099537)                                        | 24/613  | 4.28E-10 | PCDHB4;RASD2;TRIM9;SLC8A3;RIMS4;LIN7A;PCDHB6;KCINIP2;PCDHB10;PCDHB14;PCDHB12;TMOD2;KCNMB4;SYT8;DLG2;SLC24A2;KIT;GRIK3;CACNB2;HAP1;RIMS2;PCDHB9;NRXN1;PCDHB13 |
| synapse assembly (GO:0007416)                                                | 12/150  | 7.83E-08 | PCDHB4;PCDHB6;PCDHB10;PCDHB14;PCDHB12;SLITRK3;EPHA7;GPM6A;PCDHB9;NRXN1;ROBO2;PCDHB13                                                                         |
| regulation of neurotransmitter levels (GO:0001505)                           | 11/304  | 5.26E-04 | CPS1;NAALAD2;TRIM9;RIMS4;LIN7A;KCNMB4;HDC;SYT8;PRIMA1;RIMS2;NRXN1                                                                                            |
| neurotransmitter secretion (GO:0007269)                                      | 7/135   | 2.72E-03 | TRIM9;RIMS4;LIN7A;KCNMB4;SYT8;RIMS2;NRXN1                                                                                                                    |
| synaptic vesicle localization (GO:0097479)                                   | 6/121   | 9.32E-03 | TRIM9;RIMS4;LIN7A;SYT8;RIMS2;NRXN1                                                                                                                           |
| muscle system process (GO:0003012)                                           | 11/465  | 1.25E-02 | MYOC;SLC8A3;KCINIP2;TMOD2;TNNI2;TMOD1;PDE5A;PRKCA;FBXO32;KIT;CACNB2                                                                                          |
| creatinine metabolic process (GO:0046449)                                    | 2/4     | 1.53E-02 | GHR;MME                                                                                                                                                      |
| axon guidance (GO:0007411)                                                   | 7/227   | 3.20E-02 | NRP2;EPHA7;NCAM1;PRKCA;NRXN1;ROBO2;L1CAM                                                                                                                     |
| positive regulation of protein kinase B signaling (GO:0051897)               | 6/168   | 3.37E-02 | MYOC;RASD2;FGF9;ANGPT1;KIT;NRXN1                                                                                                                             |
| hypothalamus cell differentiation (GO:0021979)                               | 2/7     | 3.51E-02 | NRP2;HAP1                                                                                                                                                    |
| pointed-end actin filament capping (GO:0051694)                              | 2/7     | 3.51E-02 | TMOD2;TMOD1                                                                                                                                                  |
| calcium ion-regulated exocytosis of neurotransmitter (GO:0048791)            | 3/30    | 3.66E-02 | RIMS4;SYT8;RIMS2                                                                                                                                             |
| regulation of calcium ion-dependent exocytosis (GO:0017158)                  | 4/70    | 4.04E-02 | TRIM9;RIMS4;SYT8;RIMS2                                                                                                                                       |
| negative regulation of supramolecular fiber organization (GO:1902904)        | 5/127   | 4.71E-02 | MYOC;TMOD2;TMOD1;TMEFF2;PLEKHH2                                                                                                                              |
| regulation of membrane potential (GO:0042391)                                | 9/414   | 4.71E-02 | MYOC;SLC8A3;RIMS4;KCINIP2;KCNMB4;GRIK3;CACNB2;RIMS2;NRXN1                                                                                                    |
| synaptic vesicle cycle (GO:0099504)                                          | 5/128   | 4.75E-02 | TRIM9;RIMS4;SYT8;RIMS2;NRXN1                                                                                                                                 |
| blood circulation (GO:0008015)                                               | 10/501  | 4.75E-02 | CPS1;SLC8A3;KCINIP2;TNNI2;NTS;KCNMB4;PDE5A;ANGPT1;CACNB2;MME                                                                                                 |



Table 3B. Reactome pathways of the genes higher expressed with age

| Term                              | Overlap | FDR      | Genes                                                        |
|-----------------------------------|---------|----------|--------------------------------------------------------------|
| Muscle contraction (R-HSA-397014) | 8/200   | 1.06E-02 | TBX5;SLC8A3;KCNIP2;TMOD2;TNNI2;TMOD1;CACNA2D3;CACNB2         |
| cGMP effects (R-HSA-418457)       | 3/18    | 2.77E-02 | KCNMB4;PRKG2;PDE5A                                           |
| Neuronal System (R-HSA-112316)    | 9/365   | 3.42E-02 | LIN7A;SLITTRK3;KCNMB4;DLG2;PRKCA;CACNA2D3;GRIK3;CACNB2;NRXN1 |

Table 3C. Biological processes of the genes lower expressed with age

| Term                                                     | Overlap | FDR      | Genes                                                                                                                                                                                                                                                                                                           |
|----------------------------------------------------------|---------|----------|-----------------------------------------------------------------------------------------------------------------------------------------------------------------------------------------------------------------------------------------------------------------------------------------------------------------|
| mitotic cell cycle process (GO:1903047)                  | 36/776  | 2.27E-17 | TACC3;MCM10;ORC1;TPX2;MCM5;GINS1;MYBL2;E2F1;PTPN6;CDC20;CENPF;KIF14;NCAPH;CIT;TOP2A;ESPL1;NUSAP1;KIF23;KIF11;CENPE;BRCA2;DTL;MKI67;CHEK1;HMGA2;BUB1B;RFWD3;BUB1;INSR;RRM2;UBE2C;AURKB;IQGAP3;KNTC1;BLM;KIFC1                                                                                                    |
| nuclear division (GO:0000280)                            | 27/401  | 1.02E-16 | TACC3;ASPM;TPX2;MYBL2;CDC20;CENPF;KIF14;NCAPH;TOP2A;ESPL1;BRIP1;NUSAP1;KIF23;KIF11;CENPE;BRCA2;FANCD2;MKI67;CHEK1;BUB1B;BUB1;INSR;UBE2C;AURKB; KNTC1;FANCA;KIFC1                                                                                                                                                |
| regulation of cell cycle process (GO:0010564)            | 28/706  | 5.06E-12 | TACC3;TPX2;E2F1;PTPN6;CDC20;CENPF;KIF14;CIT;ESPL1;NUSAP1;KIF23;KIF11;CENPE;BRCA2;DTL;MKI67;CHEK1;HMGA2;BUB1B;RFWD3;BUB1;INSR;RRM2;UBE2C;RMI2; AURKB;KNTC1;BLM                                                                                                                                                   |
| cell proliferation (GO:0008283)                          | 38/2121 | 5.45E-07 | TACC3;BTN3A1;MCM10;ERBB3;ASPM;TPX2;SIRPG;GINS1;HCK;E2F1;CD79A;JAK3;PTPN6;STAT1;CDC20;CENPF;KIF14;HELLS;BTN2A2;ABCC4;IDO1;BRIP1;BRCA2;TNFRSF11A;MKI67;CHEK1;HMGA2;BUB1B;KIF15;LGALS9;CXCL10;BUB1;INSR;MARCKSL1;AURKB;IQGAP3;FANCA;NOX5                                                                           |
| immune system process (GO:0002376)                       | 47/3044 | 5.45E-07 | BTN3A1;LAMP3;SIRPG;BLNK;GZMB;HCK;CD79A;JAK3;OAS3;PTPN6;STAT1;HELLS;CD97;BTN2A2;IDO1;TOP2A;KIF23;KIF11;CENPE;BRCA2;NLR5;TNFRSF11A;FANCD2;MERTK;PIK3AP1;AIM2;KIF15;DTX3L;TAP1;LGALS9;CXCL10;PARP14;CD7;TLR10;FANCA; HSH2D; HLA-DOA;HLA-DMA;HLA-F;IGLV3-25;IGLV3-1;IGHD;IGHV3-21;IGHV4-34; HLA-B;IGHV3-11;IGHV3-15 |
| meiotic nuclear division (GO:0140013)                    | 11/173  | 1.75E-06 | ASPM;CDC20;NCAPH;TOP2A;ESPL1;BRIP1;BRCA2;FANCD2;BUB1B;BUB1;FANCA                                                                                                                                                                                                                                                |
| regulation of defense response (GO:0031347)              | 20/738  | 5.05E-06 | HCK;PTPN6;STAT1;IDO1;NLR5;TNFRSF11A;FANCD2;PIK3AP1;AIM2;DTX3L;LGALS9;PARP14;TLR10;FANCA;IGLV3-25;IGLV3-1;IGHV4-34;HLA-B; IGHV3-11;IGHV3-15                                                                                                                                                                      |
| multi-organism process (GO:0051704)                      | 38/2424 | 1.04E-05 | ASPM;PSME4;LAMP3;IL2RB;HCK;E2F1;ASF1B;OAS3;STAT1;NCAPH;HIST1H1A;IDO1;TOP2A;NUP210;BRIP1;BRCA2;DIAPH3;NLR5;TNFRSF11A;FANCD2;HMGA2;CENPU;MERTK;AIM2;DTX3L;LPO;TAP1;LGALS9;CXCL10;BUB1;INSR;SPATA32;FANCA;IGHD; IGHV3-21;HLA-B;KIFC1;NOX5                                                                          |
| DNA replication (GO:0006260)                             | 12/267  | 1.07E-05 | MCM10;ORC1;MCM5;GINS1;BRIP1;BRCA2;DTL;CHEK1;RFWD3;RRM2;RMI2;BLM                                                                                                                                                                                                                                                 |
| interferon-gamma-mediated signaling pathway (GO:0060333) | 7/85    | 5.56E-05 | HCK;OAS3;STAT1;NLR5;PARP14;HLA-F;HLA-B                                                                                                                                                                                                                                                                          |

Table 3C (Continued)

| Term                                                                                                  | Overlap | FDR      | Genes                                                                                       |
|-------------------------------------------------------------------------------------------------------|---------|----------|---------------------------------------------------------------------------------------------|
| centromere complex assembly (GO:0034508)                                                              | 5/52    | 5.63E-04 | CENPF;HELLS;HJURP;CENPE;CENPU                                                               |
| DNA damage checkpoint (GO:0000077)                                                                    | 7/148   | 1.16E-03 | E2F1;BRIP1;DTL;CHEK1;HMGA2;RFWD3;BLM                                                        |
| inner cell mass cell proliferation (GO:0001833)                                                       | 3/12    | 1.18E-03 | GINS1;BRCA2;CHEK1                                                                           |
| leukocyte migration (GO:0050900)                                                                      | 12/464  | 1.19E-03 | SIRPG;HCK;PTPN6;TNFRSF11A;MERTK;LGALS9;CXCL10;IGLV3-25;IGLV3-1;IGHV4-34;IGKV3-11;IGKV3-15   |
| phagocytosis (GO:0006909)                                                                             | 10/329  | 1.31E-03 | HCK;MYO7A;MERTK;IGLV3-25;IGLV3-1;IGHD;IGHV3-21;IGHV4-34;IGKV3-11;IGKV3-15                   |
| anaphase-promoting complex-dependent catabolic process (GO:0031145)                                   | 4/35    | 1.51E-03 | CDC20;BUB1B;UBE2C;AURKB                                                                     |
| regulation of interleukin-12 production (GO:0032655)                                                  | 4/51    | 5.09E-03 | JAK3;IDO1;LGALS9;HLA-B                                                                      |
| negative regulation of T cell proliferation (GO:0042130)                                              | 4/55    | 6.23E-03 | PTPN6;BTN2A2;IDO1;LGALS9                                                                    |
| natural killer cell mediated cytotoxicity (GO:0042267)                                                | 4/55    | 6.23E-03 | GZMB;PTPN6;LGALS9;HLA-B                                                                     |
| positive regulation of defense response to virus by host (GO:0002230)                                 | 3/24    | 6.53E-03 | STAT1;AIM2;DTX3L                                                                            |
| metaphase plate congression (GO:0051310)                                                              | 4/57    | 6.90E-03 | CENPF;KIF14;CENPE;KIFC1                                                                     |
| regulation of complement activation (GO:0030449)                                                      | 5/105   | 7.93E-03 | IGLV3-25;IGLV3-1;IGHV4-34;IGKV3-11;IGKV3-15                                                 |
| cellular response to hydroxyurea (GO:0072711)                                                         | 2/7     | 9.84E-03 | TIMELLESS;BLM                                                                               |
| positive regulation of interleukin-1 secretion (GO:0050716)                                           | 3/29    | 9.96E-03 | AIM2;LGALS9;IGHD                                                                            |
| regulation of regulatory T cell differentiation (GO:0045589)                                          | 3/29    | 9.96E-03 | FANCD2;LGALS9;FANCA                                                                         |
| respiratory burst (GO:0045730)                                                                        | 3/32    | 1.21E-02 | HCK;CD52;INSR                                                                               |
| regulation of single stranded viral RNA replication via double stranded DNA intermediate (GO:0045091) | 2/9     | 1.45E-02 | TOP2A;HMGA2                                                                                 |
| regulation of transferase activity (GO:0051338)                                                       | 15/961  | 1.62E-02 | ERBB3;TPX2;PTPN6;CDC20;KIF14;CENPE;NLRC5;TNFRSF11A;DTX3L;CXCL10;INSR;UBE2C;AURKB;IQGAP3;BLM |
| histone phosphorylation (GO:0016572)                                                                  | 3/37    | 1.71E-02 | CHEK1;HMGA2;AURKB                                                                           |

Table 3C (Continued)

| Term                                                                                           | Overlap | FDR      | Genes                                            |
|------------------------------------------------------------------------------------------------|---------|----------|--------------------------------------------------|
| retrograde vesicle-mediated transport, Golgi to ER (GO:0006890)                                | 4/83    | 1.99E-02 | KIF23;KIF11;CENPE;KIF15                          |
| positive regulation of ubiquitin protein ligase activity (GO:1904668)                          | 2/13    | 2.56E-02 | CDC20;UBE2C                                      |
| prostaglandin secretion (GO:0032310)                                                           | 2/13    | 2.56E-02 | ABCC4;TNFRSF11A                                  |
| B cell receptor signaling pathway (GO:0050853)                                                 | 4/103   | 3.59E-02 | CD79A;PTPN6;IGHD;IGHV3-21                        |
| peptidyl-tyrosine autophosphorylation (GO:0038083)                                             | 3/53    | 3.77E-02 | HCK;JAK3;INSR                                    |
| regulation of DNA-binding transcription factor activity (GO:0051090)                           | 8/406   | 4.01E-02 | HCK;NLR5;TNFRSF11A;FANCD2;HMG2;AIM2;LGALS9;FANCA |
| kynurenic acid metabolic process (GO:0034275)                                                  | 1/1     | 4.25E-02 | IDO1                                             |
| protein localization to kinetochore (GO:0034501)                                               | 2/18    | 4.25E-02 | BUB1B;AURKB                                      |
| mesodermal-epidermal cell signaling (GO:0003131)                                               | 1/1     | 4.25E-02 | HMG2                                             |
| regulation of mammary gland epithelial cell proliferation (GO:0033599)                         | 2/18    | 4.25E-02 | BRCA2;IQGAP3                                     |
| negative regulation of FasL biosynthetic process (GO:0045221)                                  | 1/1     | 4.25E-02 | JAK3                                             |
| cerebellar granular layer structural organization (GO:0021685)                                 | 1/1     | 4.25E-02 | KIF14                                            |
| thiocyanate metabolic process (GO:0018969)                                                     | 1/1     | 4.25E-02 | LPO                                              |
| negative regulation of metanephric nephron tubule epithelial cell differentiation (GO:0072308) | 1/1     | 4.25E-02 | STAT1                                            |
| lateral attachment of mitotic spindle microtubules to kinetochore (GO:0099607)                 | 1/1     | 4.25E-02 | CENPE                                            |
| negative regulation by virus of viral protein levels in host cell (GO:0046725)                 | 1/1     | 4.25E-02 | STAT1                                            |
| female sex differentiation (GO:0046660)                                                        | 4/112   | 4.25E-02 | BRCA2;MERTK;INSR;FANCA                           |
| toll-like receptor 10 signaling pathway (GO:0034166)                                           | 1/1     | 4.25E-02 | TLR10                                            |

Table 3D. Reactome pathways of the genes lower expressed with age

| Term                                                                                              | Overlap | FDR      | Genes                                                                                                                                                                                           |
|---------------------------------------------------------------------------------------------------|---------|----------|-------------------------------------------------------------------------------------------------------------------------------------------------------------------------------------------------|
| Cell Cycle (R-HSA-1640170)                                                                        | 32/628  | 5.52E-13 | MCM10;PSME4;ORC1;TPX2;MCM5;GINS1;MYBL2;E2F1;LMNB1;CDC20;CENPF;NCAPH;HJURP;TOP2A;NUP210;ESPL1;BRIP1;KIF23;CENPE;BRCA2;CHEK1;CENPU;BUB1;BUB1B;RRM2;UBE2C;RMI2;AURKB;KNTC1;HIST1H2BL;BLM;HIST1H2AJ |
| Antigen activates B Cell Receptor (BCR) leading to generation of second messengers (R-HSA-983695) | 10/89   | 1.32E-06 | BLNK;CD79A;PTPN6;PIK3AP1;IGLV3-25;IGLV3-1;IGHD;IGHV4-34; IGKV3-11;IGKV3-15                                                                                                                      |
| RHO GTPase Effectors (R-HSA-195258)                                                               | 14/296  | 3.09E-05 | CDC20;CENPF;KIF14;CIT;CENPE;DIAPH3;CENPU;BUB1B;BUB1;AURKB; IQ-GAP3;KNTC1;HIST1H2BL;HIST1H2AJ                                                                                                    |
| Presynaptic phase of homolo (G)us DNA pairing and strand exchange (R-HSA-5693616)                 | 5/39    | 7.40E-04 | BRIP1;BRCA2;CHEK1;RMI2;BLM                                                                                                                                                                      |
| FCGR activation (R-HSA-2029481)                                                                   | 6/67    | 8.98E-04 | HCK;IGLV3-25;IGLV3-1;IGHV4-34;IGKV3-11;IGKV3-15                                                                                                                                                 |
| Kinesins (R-HSA-983189)                                                                           | 5/42    | 9.35E-04 | KIF23;KIF11;CENPE;KIF15;KIFC1                                                                                                                                                                   |
| Interleukin-3,5 and GM-CSF signaling (R-HSA-512988)                                               | 5/44    | 1.09E-03 | BLNK;IL2RB;HCK;JAK3;PTPN6                                                                                                                                                                       |
| Interleukin-2 family signaling (R-HSA-451927)                                                     | 5/44    | 1.09E-03 | IL2RB;JAK3;PTPN6;STAT1;LGALS9                                                                                                                                                                   |
| DNA Replication (R-HSA-69306)                                                                     | 7/127   | 3.45E-03 | MCM10;PSME4;ORC1;MCM5;GINS1;E2F1;UBE2C                                                                                                                                                          |
| Regulation of TP53 Activity through Phosphorylation (R-HSA-6804756)                               | 6/92    | 3.88E-03 | TPX2;BRIP1;CHEK1;RMI2;AURKB;BLM                                                                                                                                                                 |
| Classical antibody-mediated complement activation (R-HSA-173623)                                  | 5/61    | 4.12E-03 | IGLV3-25;IGLV3-1;IGHV4-34;IGKV3-11;IGKV3-15                                                                                                                                                     |
| Formation of Senescence-Associated Heterochromatin Foci (SAHF) (R-HSA-2559584)                    | 3/16    | 5.15E-03 | LMNB1;HIST1H1A;HMGA2                                                                                                                                                                            |
| Role of LAT2/NTAL/LAB on calcium mobilization (R-HSA-2730905)                                     | 5/66    | 5.15E-03 | IGLV3-25;IGLV3-1;IGHV4-34;IGKV3-11;IGKV3-15                                                                                                                                                     |
| Scavenging of heme from plasma (R-HSA-2168880)                                                    | 5/67    | 5.15E-03 | IGLV3-25;IGLV3-1;IGHV4-34;IGKV3-11;IGKV3-15                                                                                                                                                     |
| Cell surface interactions at the vascular wall (R-HSA-202733)                                     | 8/190   | 5.26E-03 | SIRPG;PTPN6;MERTK;IGLV3-25;IGLV3-1;IGHV4-34;IGKV3-11;IGKV3-15                                                                                                                                   |
| COPI-dependent golgi-to-ER retrograde traffic (R-HSA-6811434)                                     | 5/81    | 9.16E-03 | KIF23;KIF11;CENPE;KIF15;KIFC1                                                                                                                                                                   |

Table 3D (Continued)

| Term                                                                                      | Overlap | FDR      | Genes                           |
|-------------------------------------------------------------------------------------------|---------|----------|---------------------------------|
| Antigen Presentation: Folding; assembly and peptide loading of class I MHC (R-HSA-983170) | 3/24    | 1.17E-02 | TAP1;HLA-F;HLA-B                |
| Transcriptional Regulation by E2F6 (R-HSA-8953750)                                        | 3/34    | 2.45E-02 | E2F1;CHEK1;RRM2                 |
| Endosomal/Vacuolar pathway (R-HSA-1236977)                                                | 2/11    | 2.65E-02 | HLA-F;HLA-B                     |
| Deposition of new CENPA-containing nucleosomes at the centromere (R-HSA-606279)           | 4/73    | 2.68E-02 | HJURP;CENPU;HIST1H2BL;HIST1H2AJ |
| Unwinding of DNA (R-HSA-176974)                                                           | 2/12    | 2.75E-02 | MCM5;GINS1                      |
| Signal regulatory protein family interactions (R-HSA-391160)                              | 2/13    | 3.13E-02 | SIRPG;PTPN6                     |
| Signaling by SCF-KIT (R-HSA-1433557)                                                      | 3/43    | 3.59E-02 | PTPN6;STAT1;CHEK1               |
| ER-Phagosome pathway (R-HSA-1236974)                                                      | 4/83    | 3.61E-02 | PSME4;TAP1;HLA-F;HLA-B          |
| SUMOylation of DNA replication proteins (R-HSA-4615885)                                   | 3/45    | 3.93E-02 | TOP2A;NUP210;AURKB              |
| Polo-like kinase mediated events (R-HSA-156711)                                           | 2/16    | 4.23E-02 | MYBL2;CENPF                     |

**Supplementary Table 4. Results of the age-related predicted target gene enrichment analyses**

| miRNAs                   | Enrichment of predicted target genes higher expressed with age |                                                                                                                           |
|--------------------------|----------------------------------------------------------------|---------------------------------------------------------------------------------------------------------------------------|
| Lower expressed with age | p-value                                                        | Genes (bold=significantly negatively correlated with miRNA)                                                               |
| miR-146b-5p              | 1.13E-02                                                       | <b>RIMS2, IGSF1, SLITRK3, NRP2</b> , XKR4                                                                                 |
| miR-142-5p               | 2.42E-05                                                       | <b>TENM3, SH3D19, KIT</b> , CSMD3, SLC24A2, LRP1B, LPHN3, TMOD1, TMEFF2, TMTC1, MPPED2, MPP6, DLG2, WNT2B, SLC23A2, PRKCA |
| miR-146a-5p              | 1.13E-02                                                       | <b>RIMS2, IGSF1</b> , SLITRK3, NRP2, XKR4                                                                                 |
| miR-409-3p               | 3.19E-02                                                       | MME, NR3C2, FGF9, NRP2, GHR                                                                                               |
